# Supplementary material for: Effects of anions on the electrospray ionization of proteins in strong acids
Source: Royal Society of Chemistry journal article supplement (doi:10.1039/d4an00421c), 2024-01-01
Supplement: d4an00421c1.pdf [file d4an00421c1.pdf]

*Supporting information*

# Effects of anions on the electrospray ionization of proteins in strong acids

Zhongbao Han<sup>1</sup>, Huiyi Zheng<sup>1</sup>, Shuyao Wu<sup>2</sup>, Liyan Liu<sup>1\*</sup>, Lee Chuin Chen<sup>3\*</sup>

<sup>1</sup>*College of Chemistry and Chemical Engineering, Shenyang Normal University, Shenyang 110034, China*

<sup>2</sup>*College of Chemistry, Liaoning University, Shenyang, 110036, China*

<sup>3</sup>*Faculty of Engineering, University of Yamanashi, 4-3-11, Takeda, Kofu, Yamanashi, 400-8511 Japan*

**\*To whom correspondence should be addressed:**

L. C. Chen, Email: leechuin@yamanashi.ac.jp, Phone: +81-55-220-8072

L. Liu, Email: liyanliu@synu.edu.cn, Phone: +86-138-8928-2570

**Keywords:** Protein, acid-induced protein compaction, molten globule state, high-pressure electrospray

## Table of Contents

| Figure     | Description                                                                           | Page |
|------------|---------------------------------------------------------------------------------------|------|
| Figure S1  | High-pressure ESI source                                                              | S-3  |
| Figure S2  | Electrical conductivities                                                             | S-4  |
| Figure S3  | Solution flow rates                                                                   | S-5  |
| Figure S4  | MS of cytochrome <i>c</i> in HCl with incremental pH (pH 1-3)                         | S-6  |
| Figure S5  | MS of cytochrome <i>c</i> in TFA with incremental pH (pH 1-3)                         | S-7  |
| Figure S6  | MS of cytochrome <i>c</i> in HNO <sub>3</sub> with incremental pH (pH 1-3)            | S-8  |
| Figure S7  | MS of cytochrome <i>c</i> in TCA with incremental pH (pH 1-3)                         | S-9  |
| Figure S8  | MS of cytochrome <i>c</i> in HClO <sub>4</sub> with incremental pH (pH 1-3)           | S-10 |
| Figure S9  | Magnified MS for cytochrome <i>c</i> in HClO <sub>4</sub>                             | S-11 |
| Figure S10 | MS of lysozyme in HCl with incremental pH (pH 1-3)                                    | S-12 |
| Figure S11 | MS of lysozyme in TFA with incremental pH (pH 1-3)                                    | S-13 |
| Figure S12 | MS of lysozyme in HNO <sub>3</sub> with incremental pH (pH 1-3)                       | S-14 |
| Figure S13 | MS of lysozyme in TCA with incremental pH (pH 1-3)                                    | S-15 |
| Figure S14 | MS of lysozyme in HClO <sub>4</sub> with incremental pH (pH 1-3)                      | S-16 |
| Figure S15 | Figure S15: Magnified MS for lysozyme in HClO <sub>4</sub>                            | S-17 |
| Figure S16 | MS of myoglobin in different acids with pH 2                                          | S-18 |
| Figure S17 | MS of Ubiquitin in different acids with pH 2                                          | S-19 |
| Figure S18 | Magnified MS for equine & bovine cytochrome <i>c</i> , lysozyme, myoglobin, ubiquitin | S-20 |
| Figure S19 | CD spectra for cytochrome <i>c</i> & myoglobin                                        | S-21 |
| Figure S20 | Average charge states                                                                 | S-22 |
| Figure S21 | Average charge for HCSD & LCSD at different pHs                                       | S-23 |
| Figure S22 | Addition of NH <sub>4</sub> OH (cytochrome <i>c</i> )                                 | S-24 |
| Figure S23 | Addition of NH <sub>4</sub> OH (myoglobin)                                            | S-25 |
| Figure S24 | Addition of NH <sub>4</sub> OH (ubiquitin)                                            | S-26 |
| Figure S25 | Addition of NH <sub>4</sub> OH (lysozyme)                                             | S-27 |

Figure S1: High-pressure ESI source

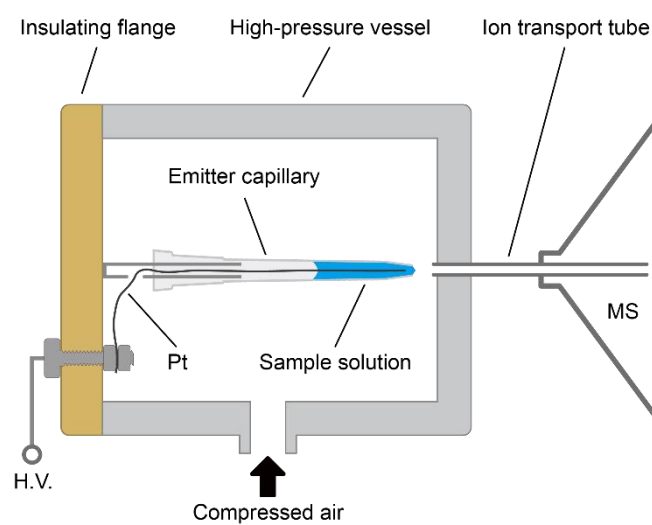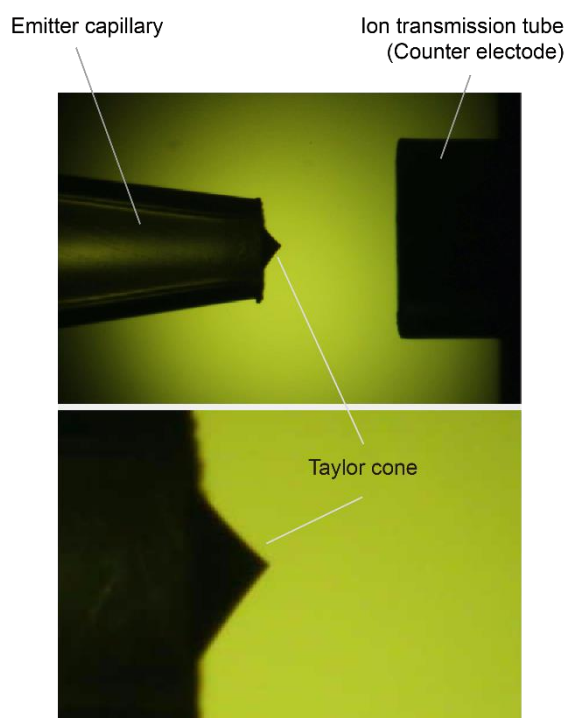

**Figure S1.** Schematic of the high-pressure nanoESI ion source. A micropipette tip (i.d.  $\sim 0.4$  mm) is used as the emitter. A platinum wire inserted into the micropipette tip is used for liquid charging. The high-pressure ion source is connected directly to the mass spectrometer using an ion transmission tube with an inner diameter of 0.25mm. A stable Taylor cone can be formed for a highly conductive aqueous solution under super-atmospheric pressure ( $> 0.3$  MPa gauge pressure). The schematic (upper figure) is adapted with permission from *Anal. Chem.*, 2023, 95, 14816–14821.

Figure S2: Electrical conductivities

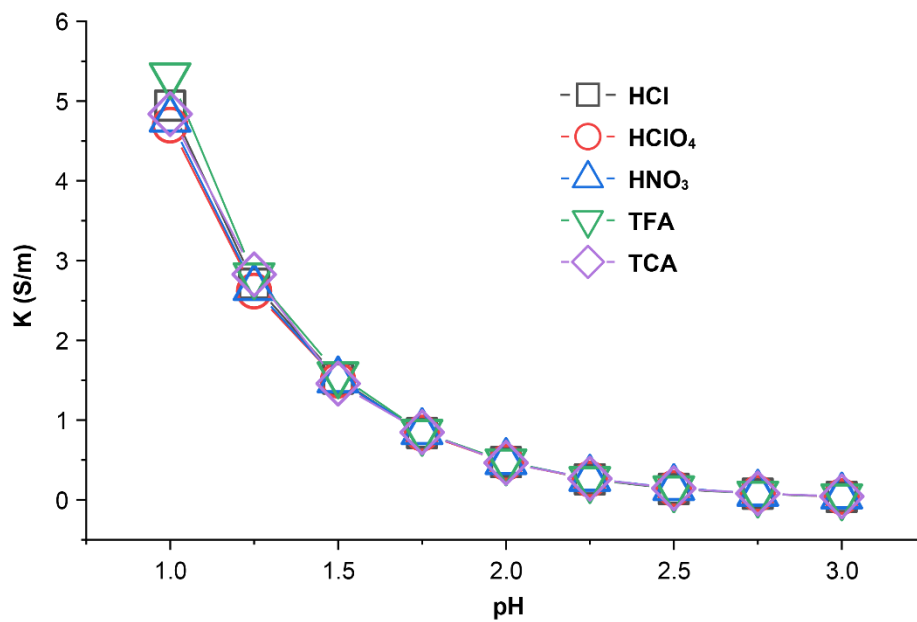

**Figure S2.** Measurement of electrical conductivities ( $K$ ) of hydrochloric acids (HCl), trifluoroacetic acid (TFA), nitric acid (HNO<sub>3</sub>), perchloric acid (HClO<sub>4</sub>), and trichloroacetic acid (TCA) with different pHs.

Figure S3: Solution flow rates

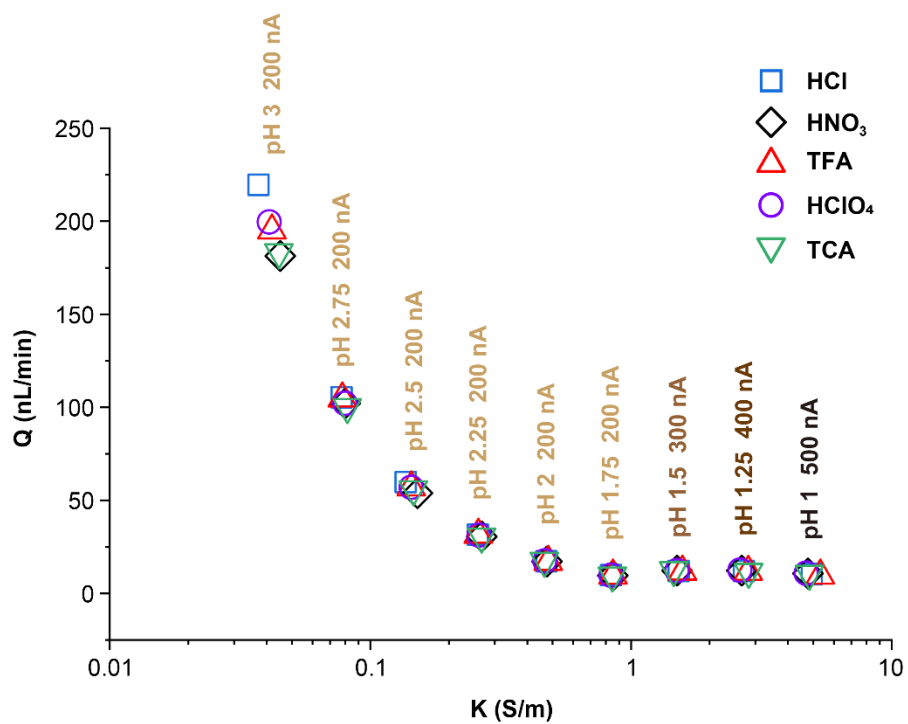

**Figure S3.** Calculated solution flow rate  $Q$  (nL/min) for solutions with different conductivity  $K$  (S/m) at different operating spray currents (200~500 nA).

Figure S4: MS of cytochrome *c* in HCl with incremental pH (pH 1-3)

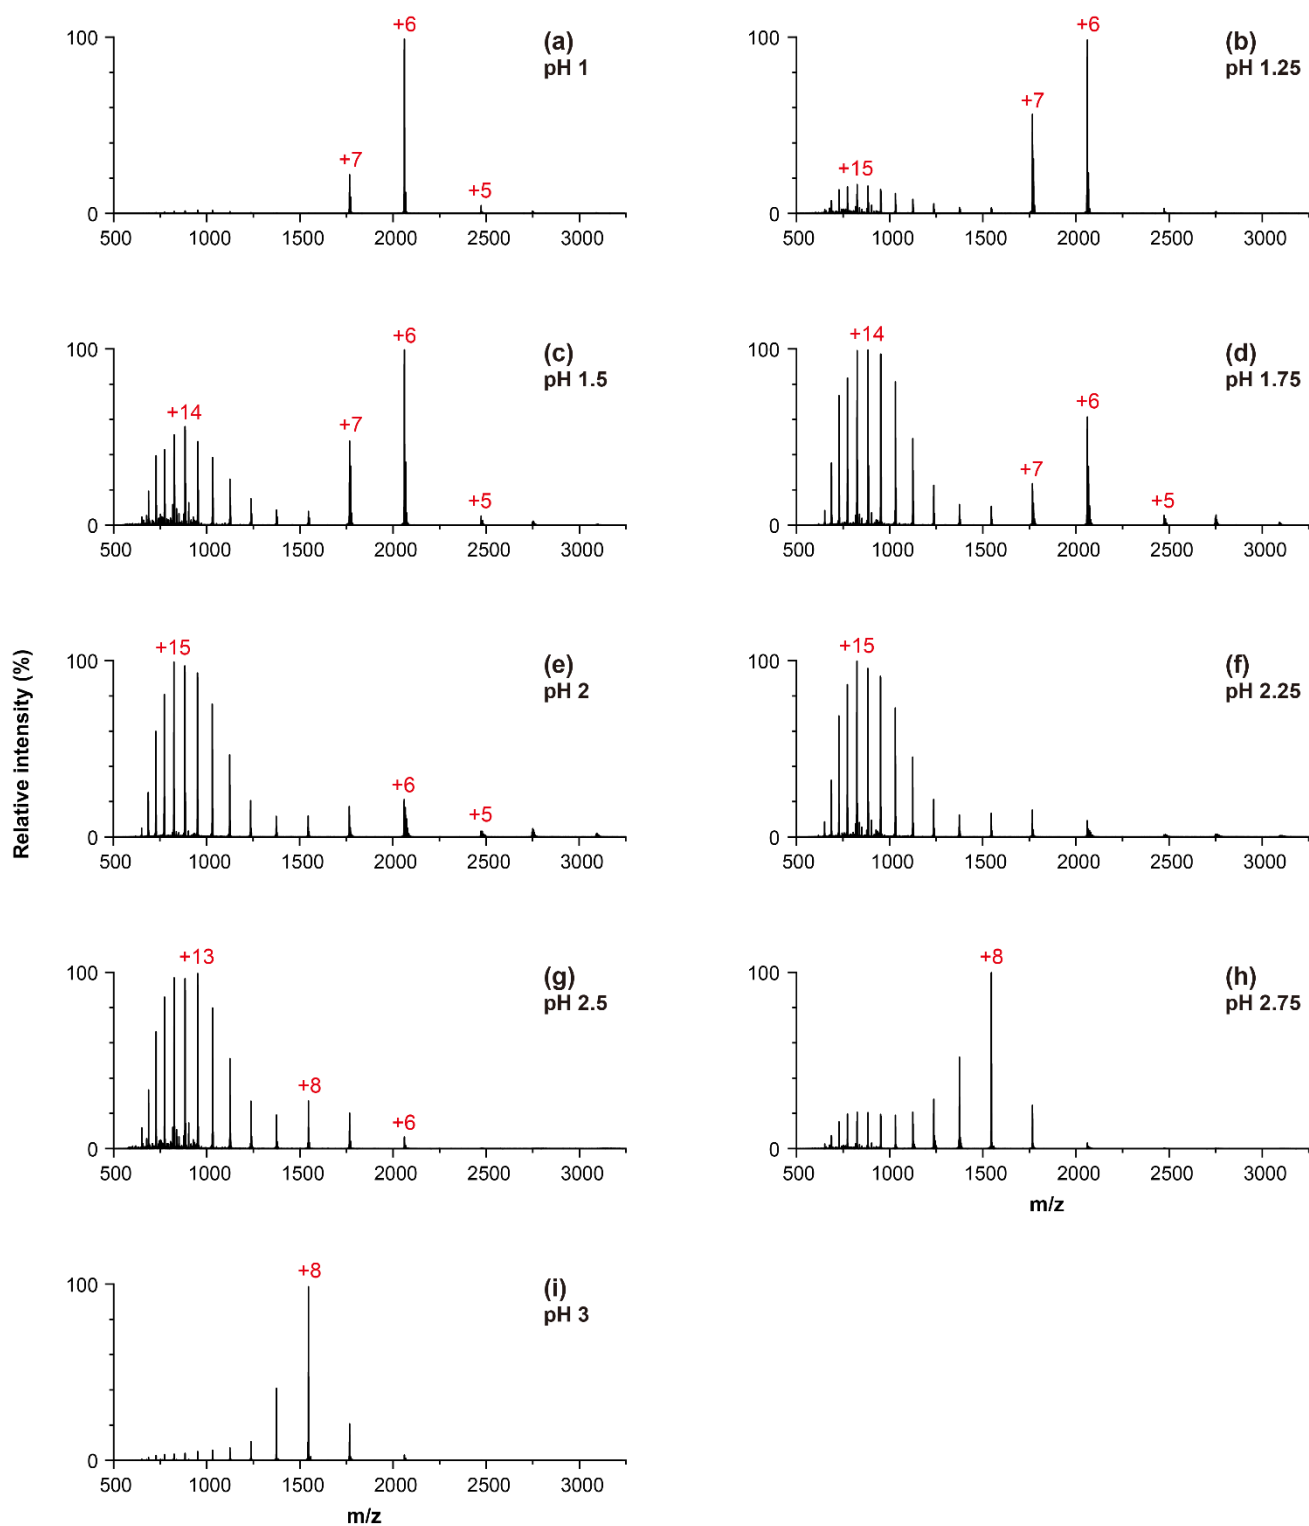

**Figure S4.** High-pressure ESI mass spectra of 10  $\mu\text{M}$  equine cytochrome *c* in HCl aqueous solution with different pH values.

Figure S5: MS of cytochrome *c* in TFA with incremental pH (pH 1-3)

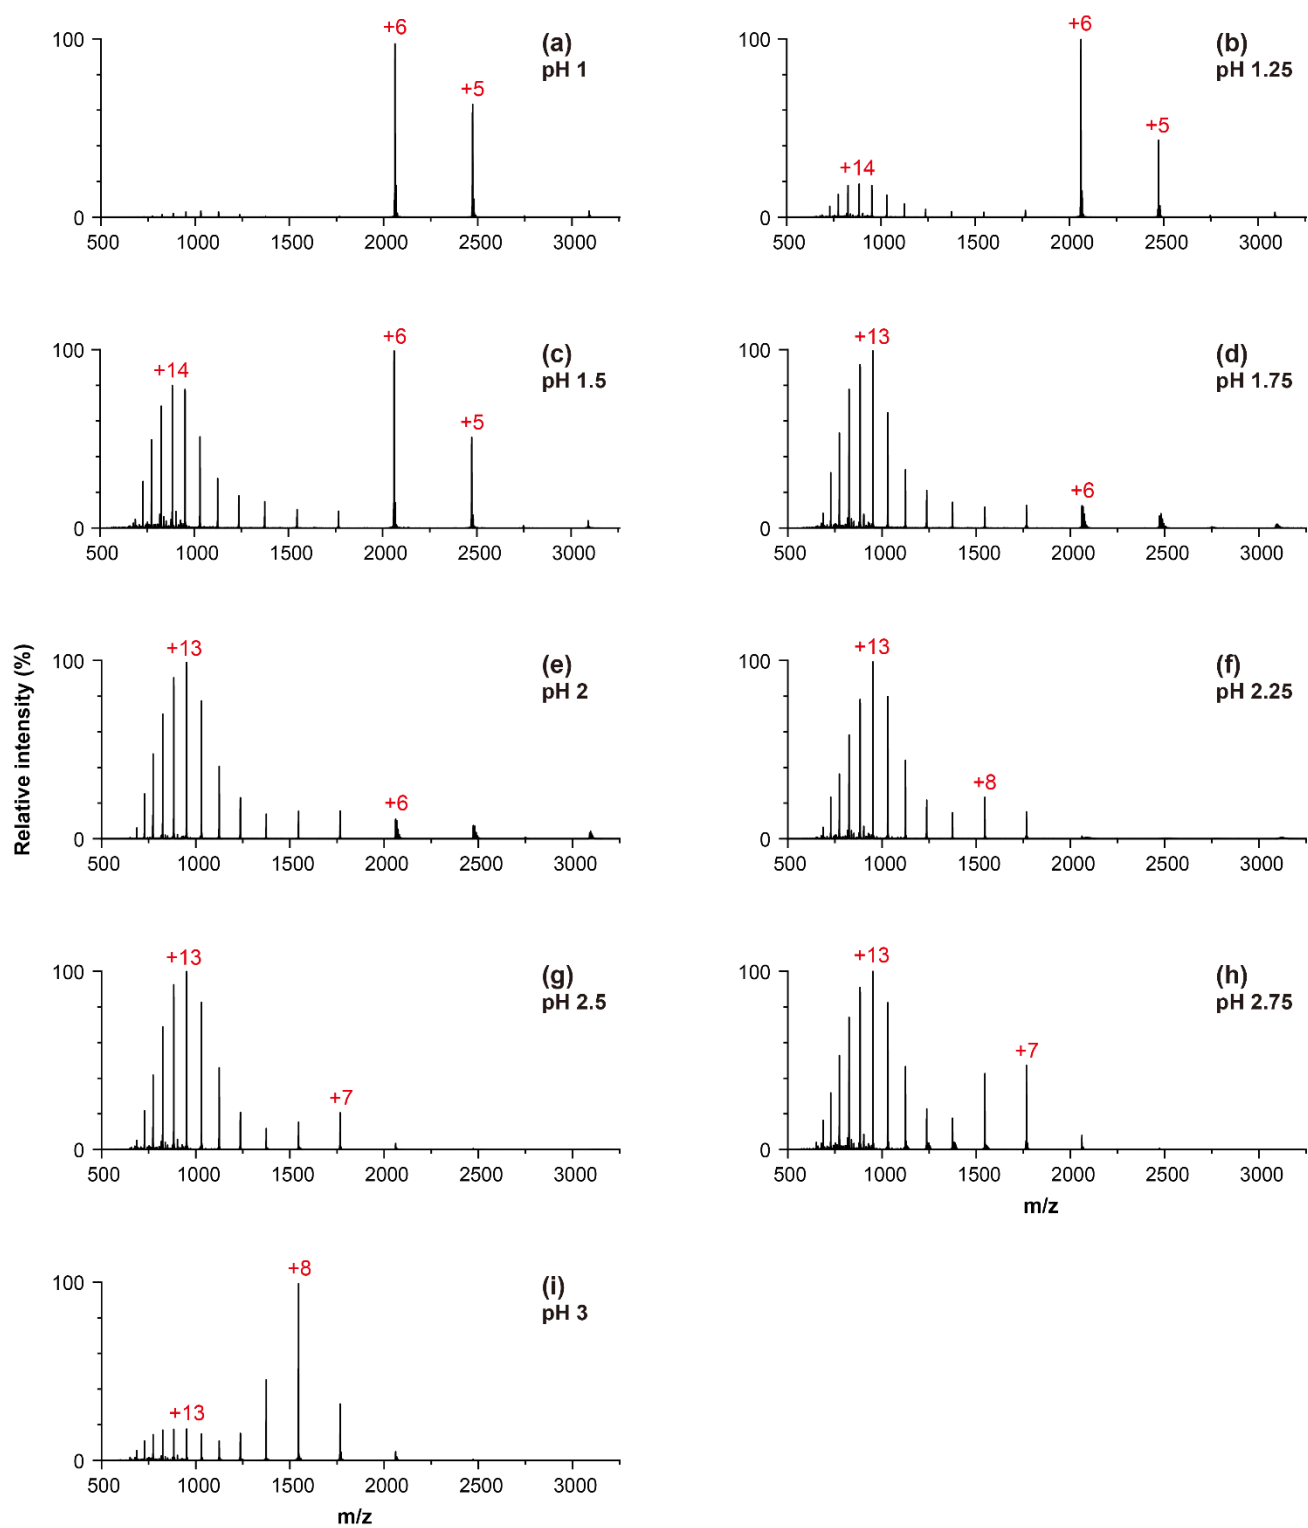

**Figure S5.** High-pressure ESI mass spectra of 10  $\mu\text{M}$  equine cytochrome *c* in TFA aqueous solution with different pH values.

Figure S6: MS of cytochrome *c* in HNO<sub>3</sub> with incremental pH (pH 1-3)

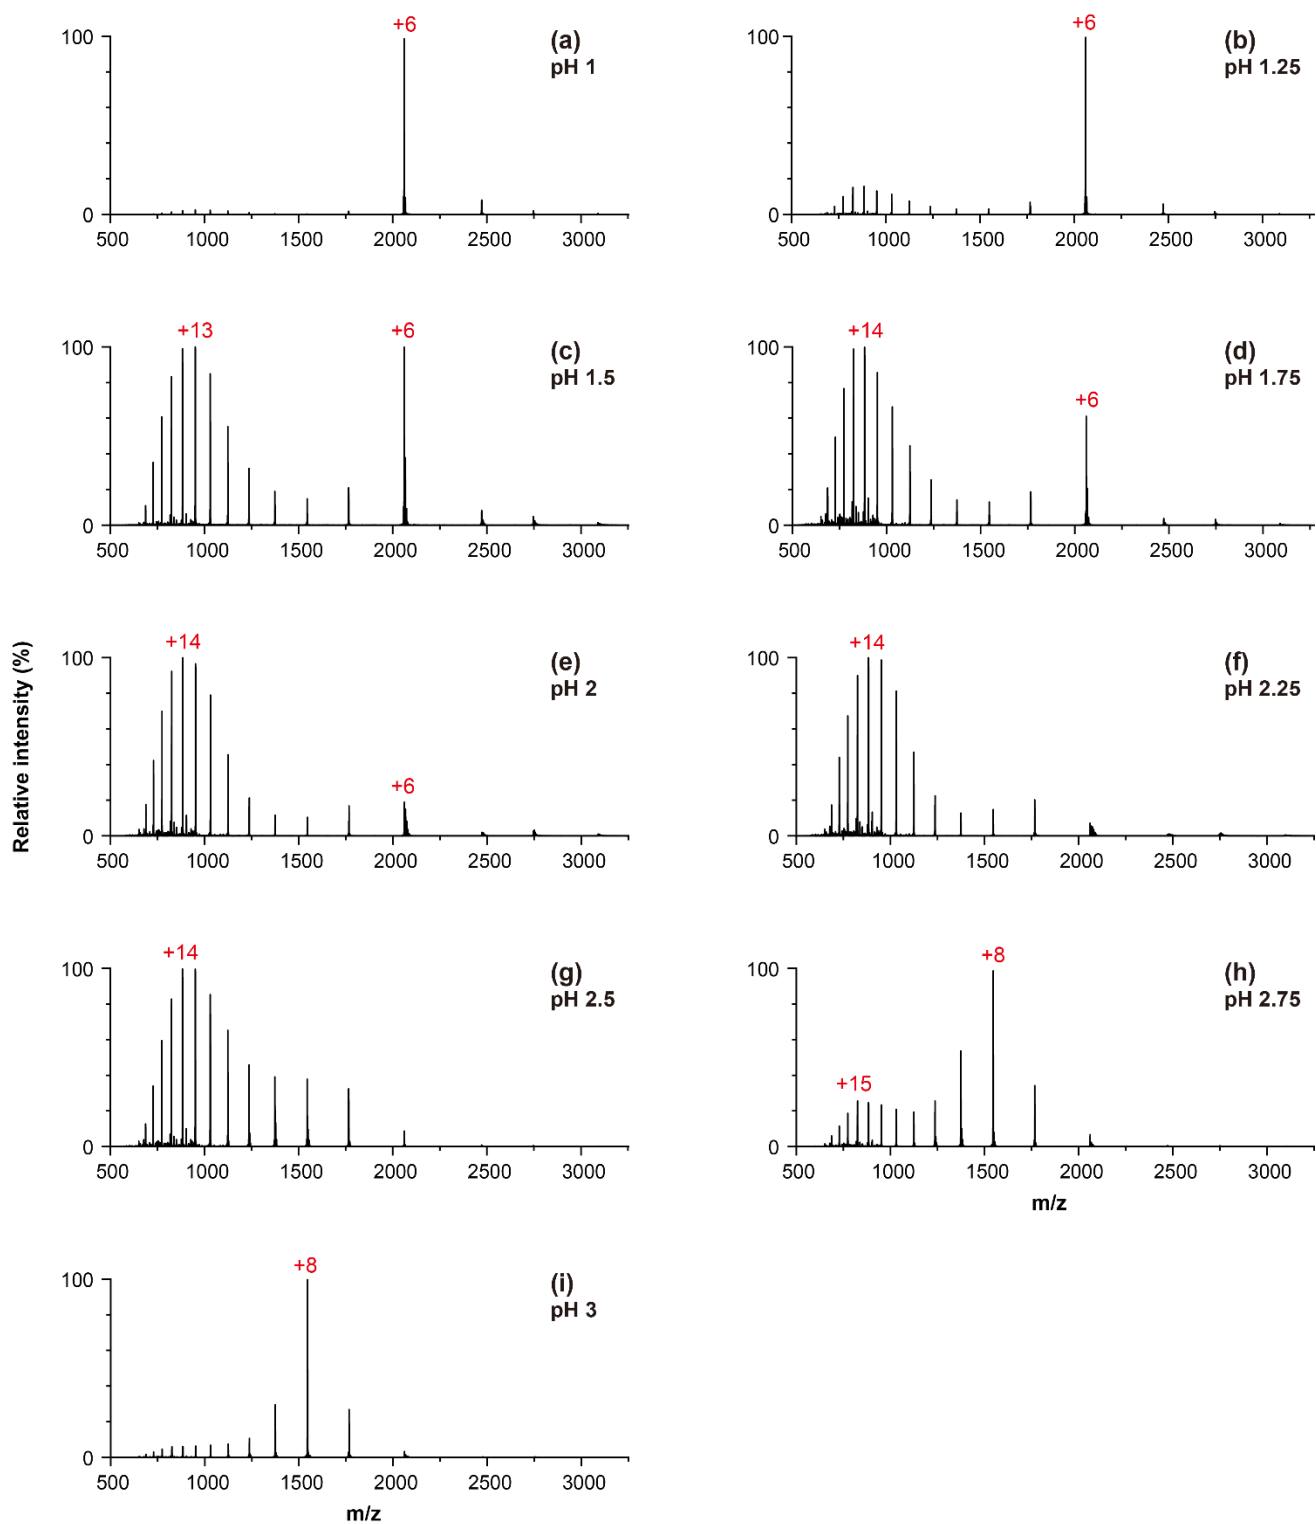

**Figure S6.** High-pressure ESI mass spectra of 10  $\mu$ M equine cytochrome *c* in HNO<sub>3</sub> aqueous solution with different pH values.



Figure S7: MS of cytochrome *c* in TCA with incremental pH (pH 1-3)

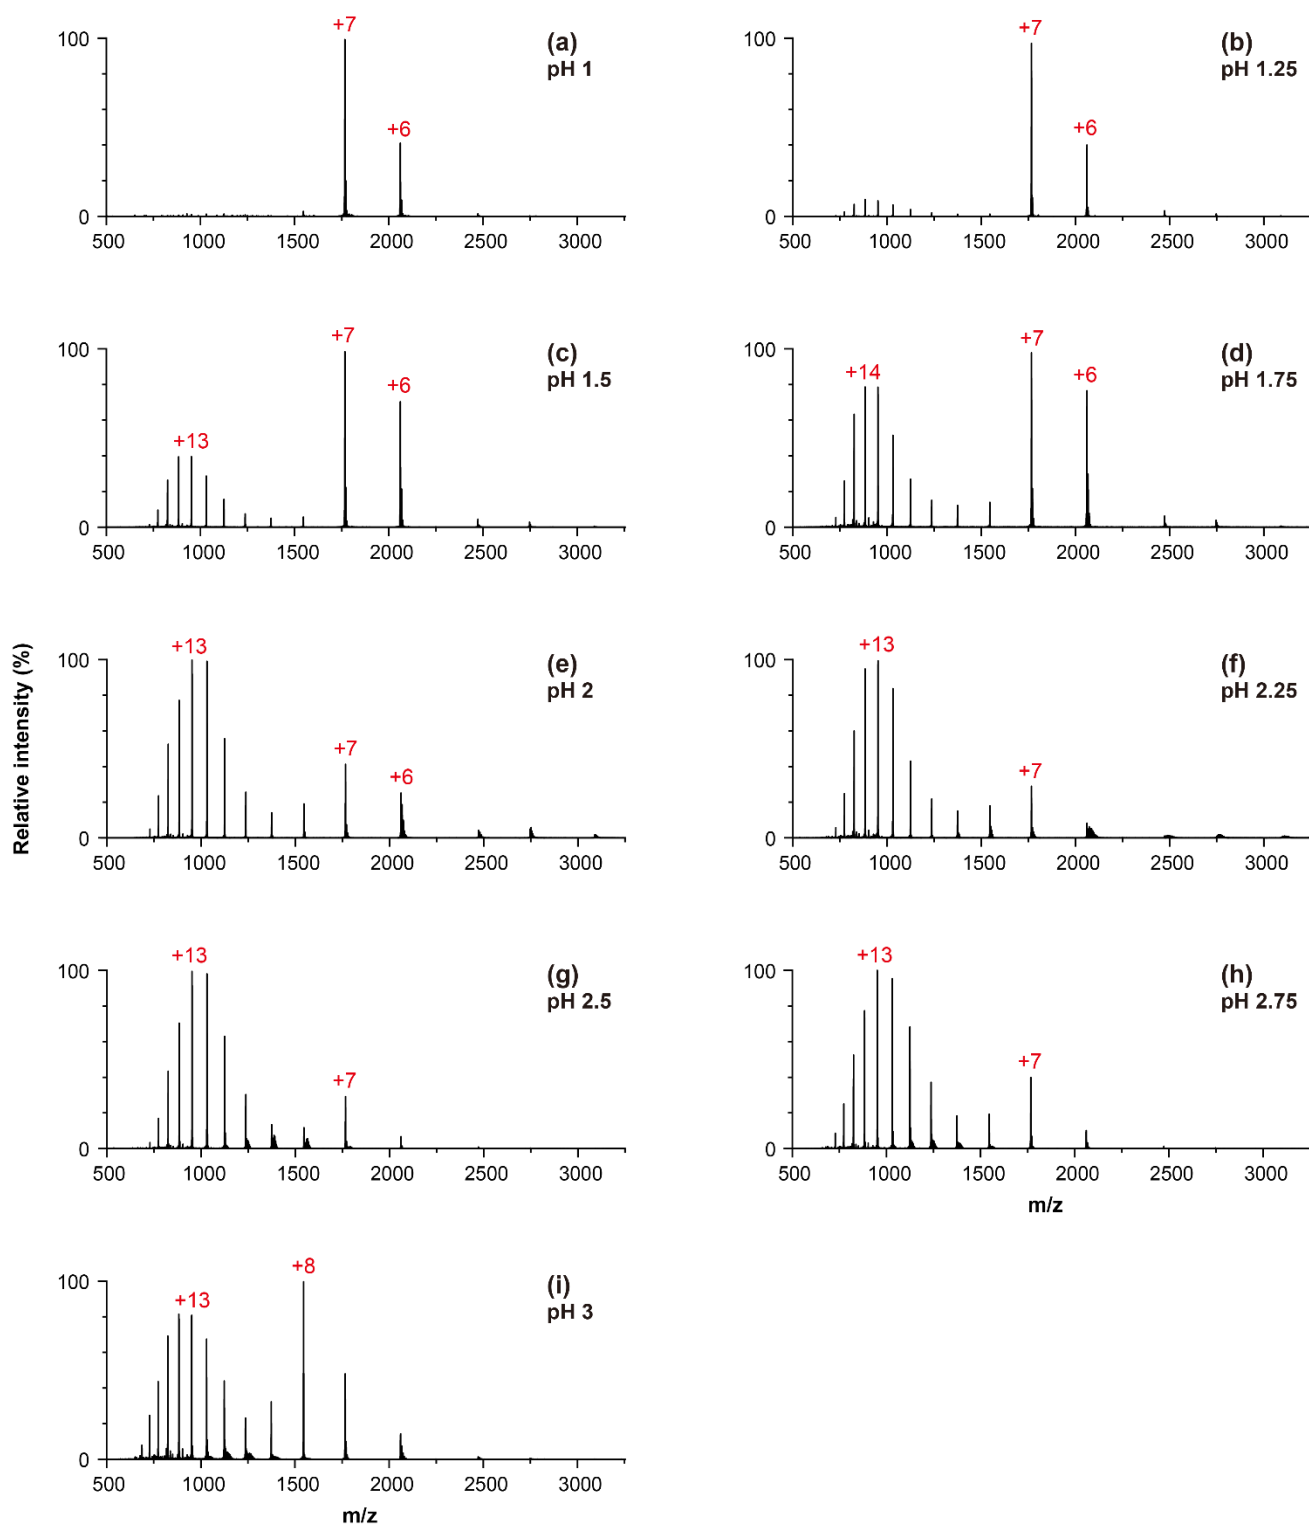

**Figure S7.** High-pressure ESI mass spectra of 10  $\mu\text{M}$  equine cytochrome *c* in TCA aqueous solution with different pH values.

Figure S8: MS of cytochrome *c* in HClO<sub>4</sub> with incremental pH (pH 1-3)

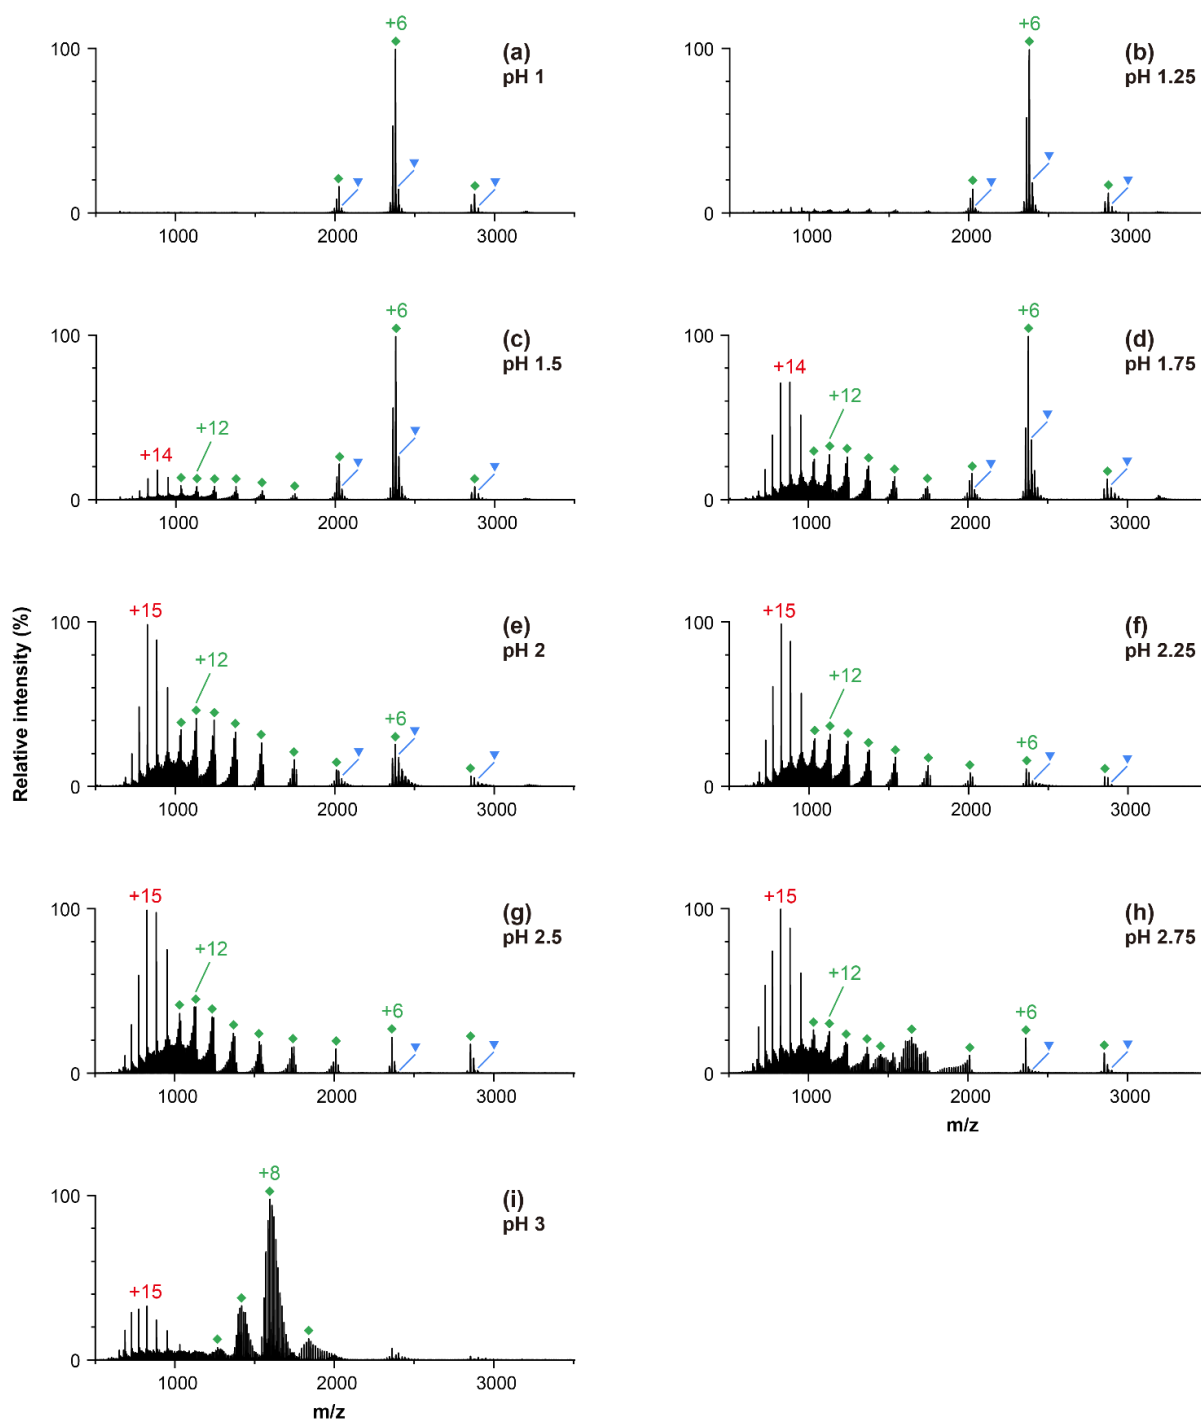

**Figure S8.** High-pressure ESI mass spectra of 10  $\mu$ M equine cytochrome *c* in HClO<sub>4</sub> aqueous solution with different pH values. The green  $\blacklozenge$  denotes protonated peaks with acid adducts, and the blue  $\blacktriangledown$  denotes peaks with adducts from acid, sodium, and sodium salt.

Figure S9: Magnified MS for cytochrome *c* in HClO<sub>4</sub>

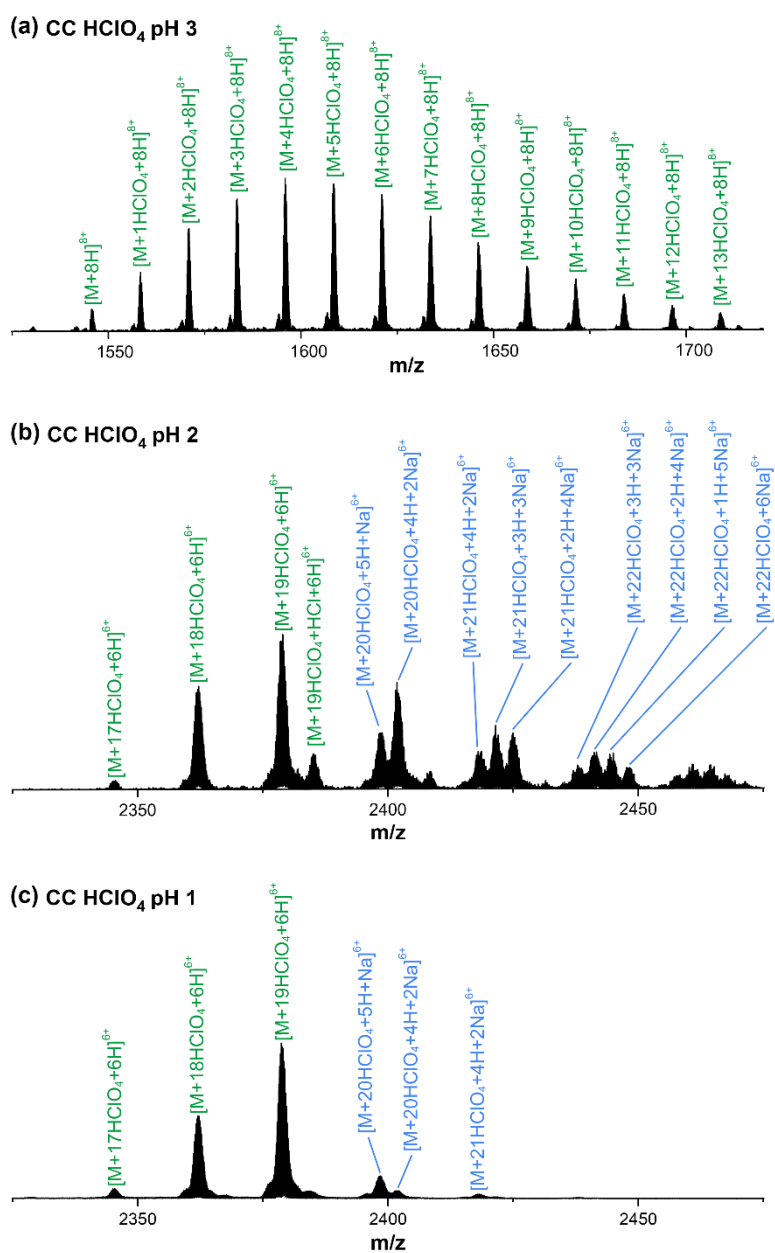

**Figure S9.** Magnified mass spectra for cytochrome *c* in perchloric acid (HClO<sub>4</sub>) with a) pH 3, b) pH 2, and c) pH 1.

Figure S10: MS of lysozyme in HCl with incremental pH (pH 1-3)

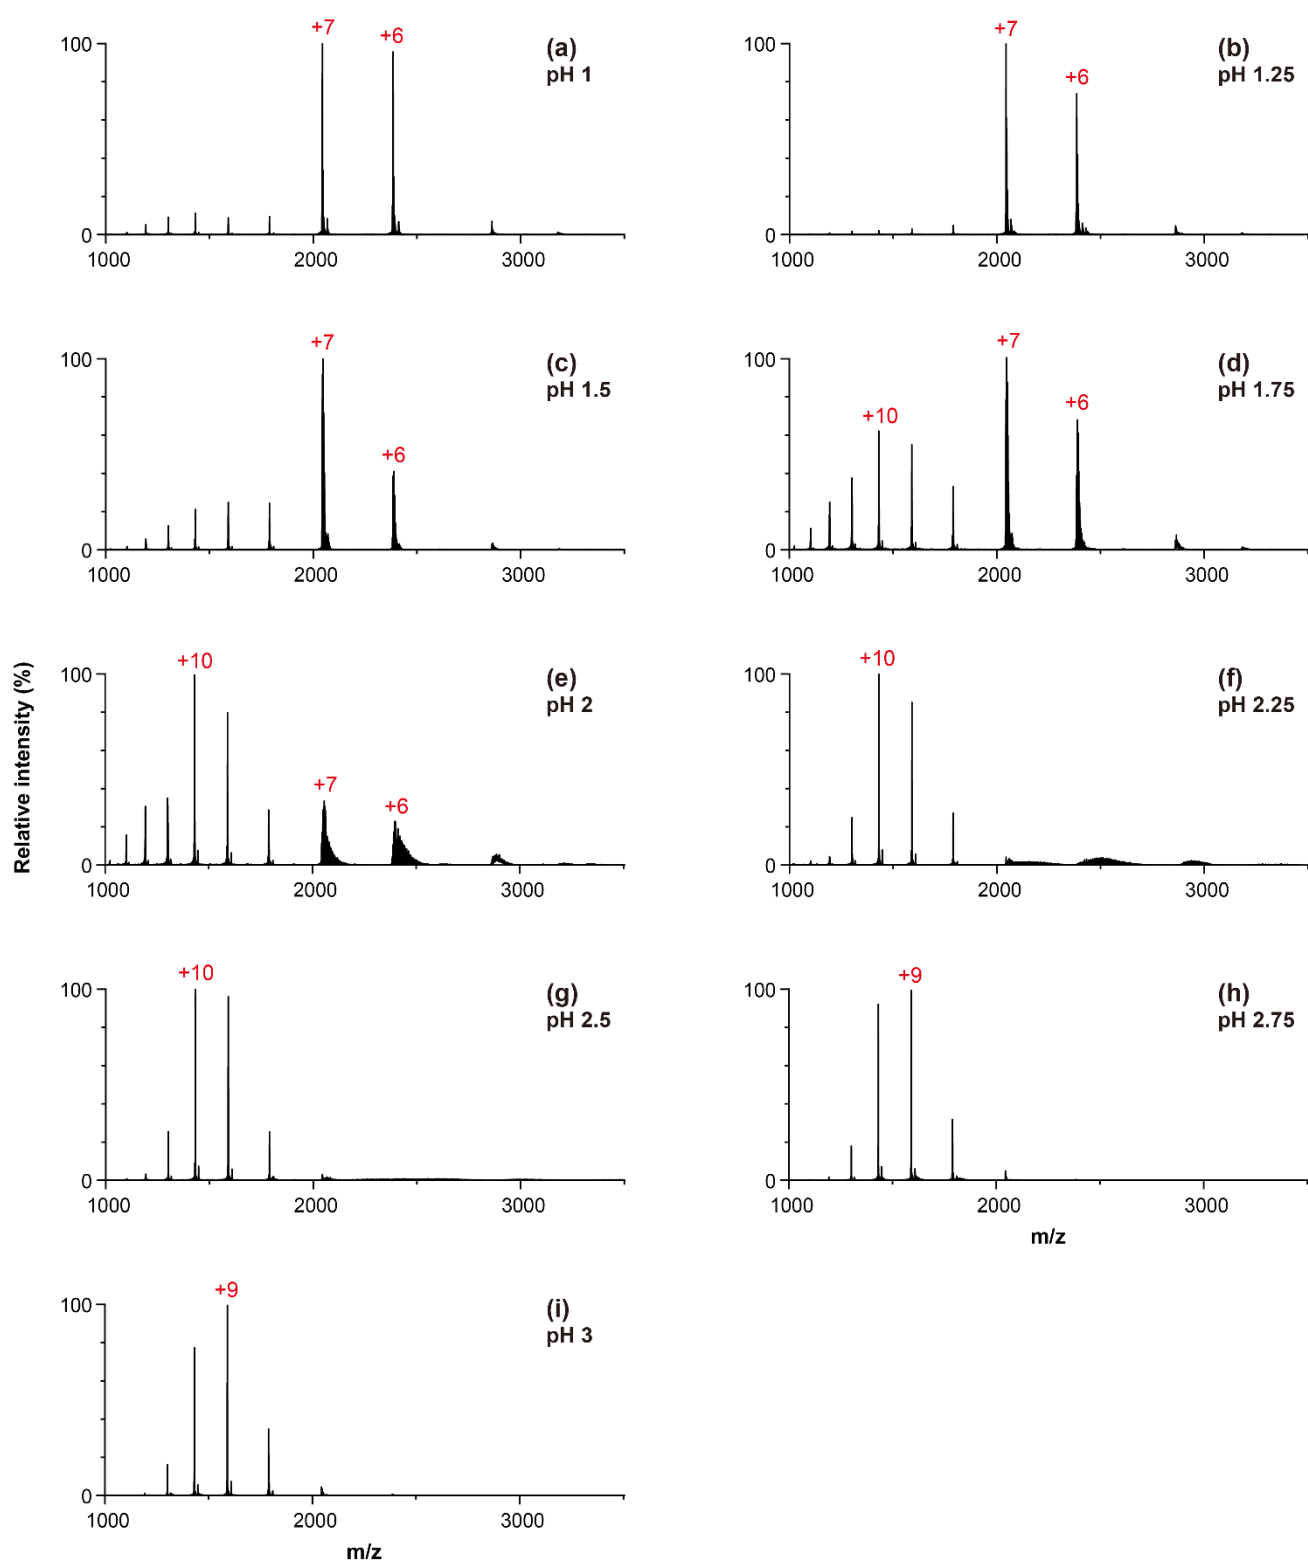

**Figure S10.** High-pressure ESI mass spectra of 10  $\mu$ M lysozyme in HCl aqueous solution with different pH values.

Figure S11: MS of lysozyme in TFA with incremental pH (pH 1-3)

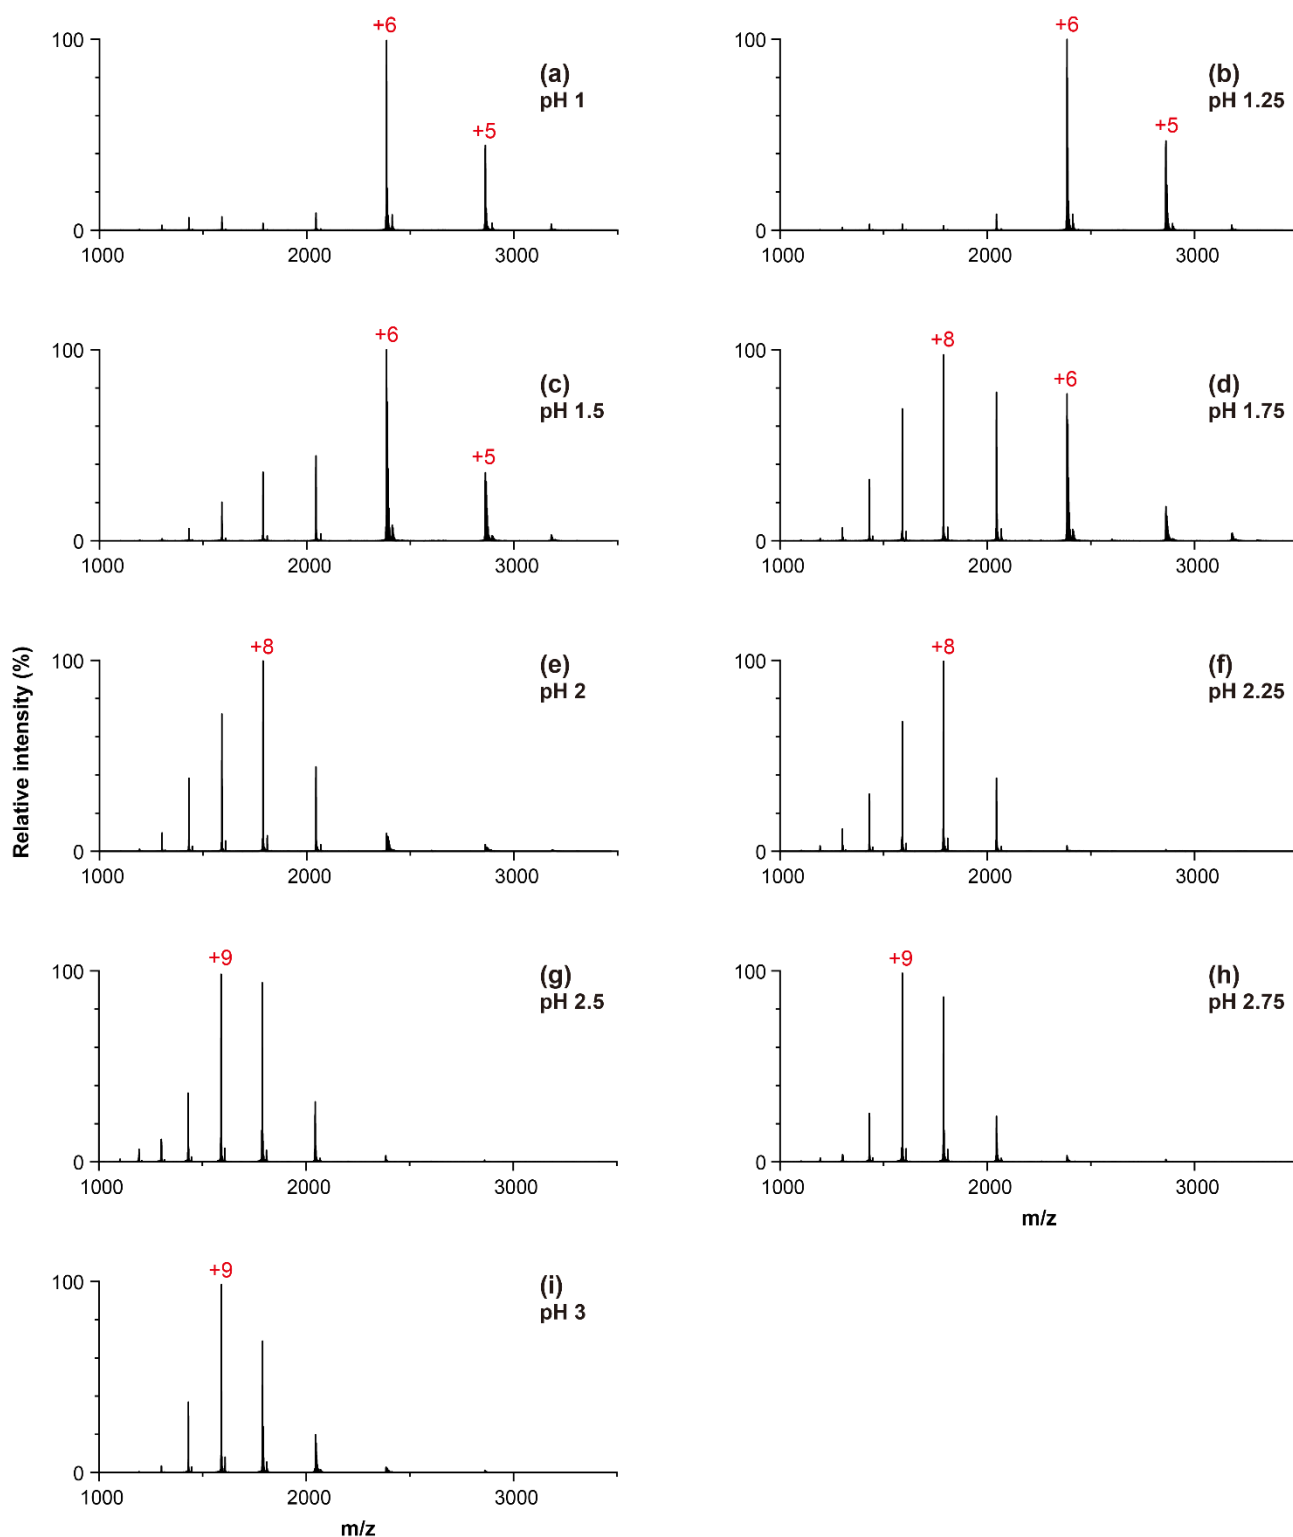

Figure S11. High-pressure ESI mass spectra of 10  $\mu$ M lysozyme in TFA aqueous solution with different pH values.

Figure S12: MS of lysozyme in HNO<sub>3</sub> with incremental pH (pH 1-3)

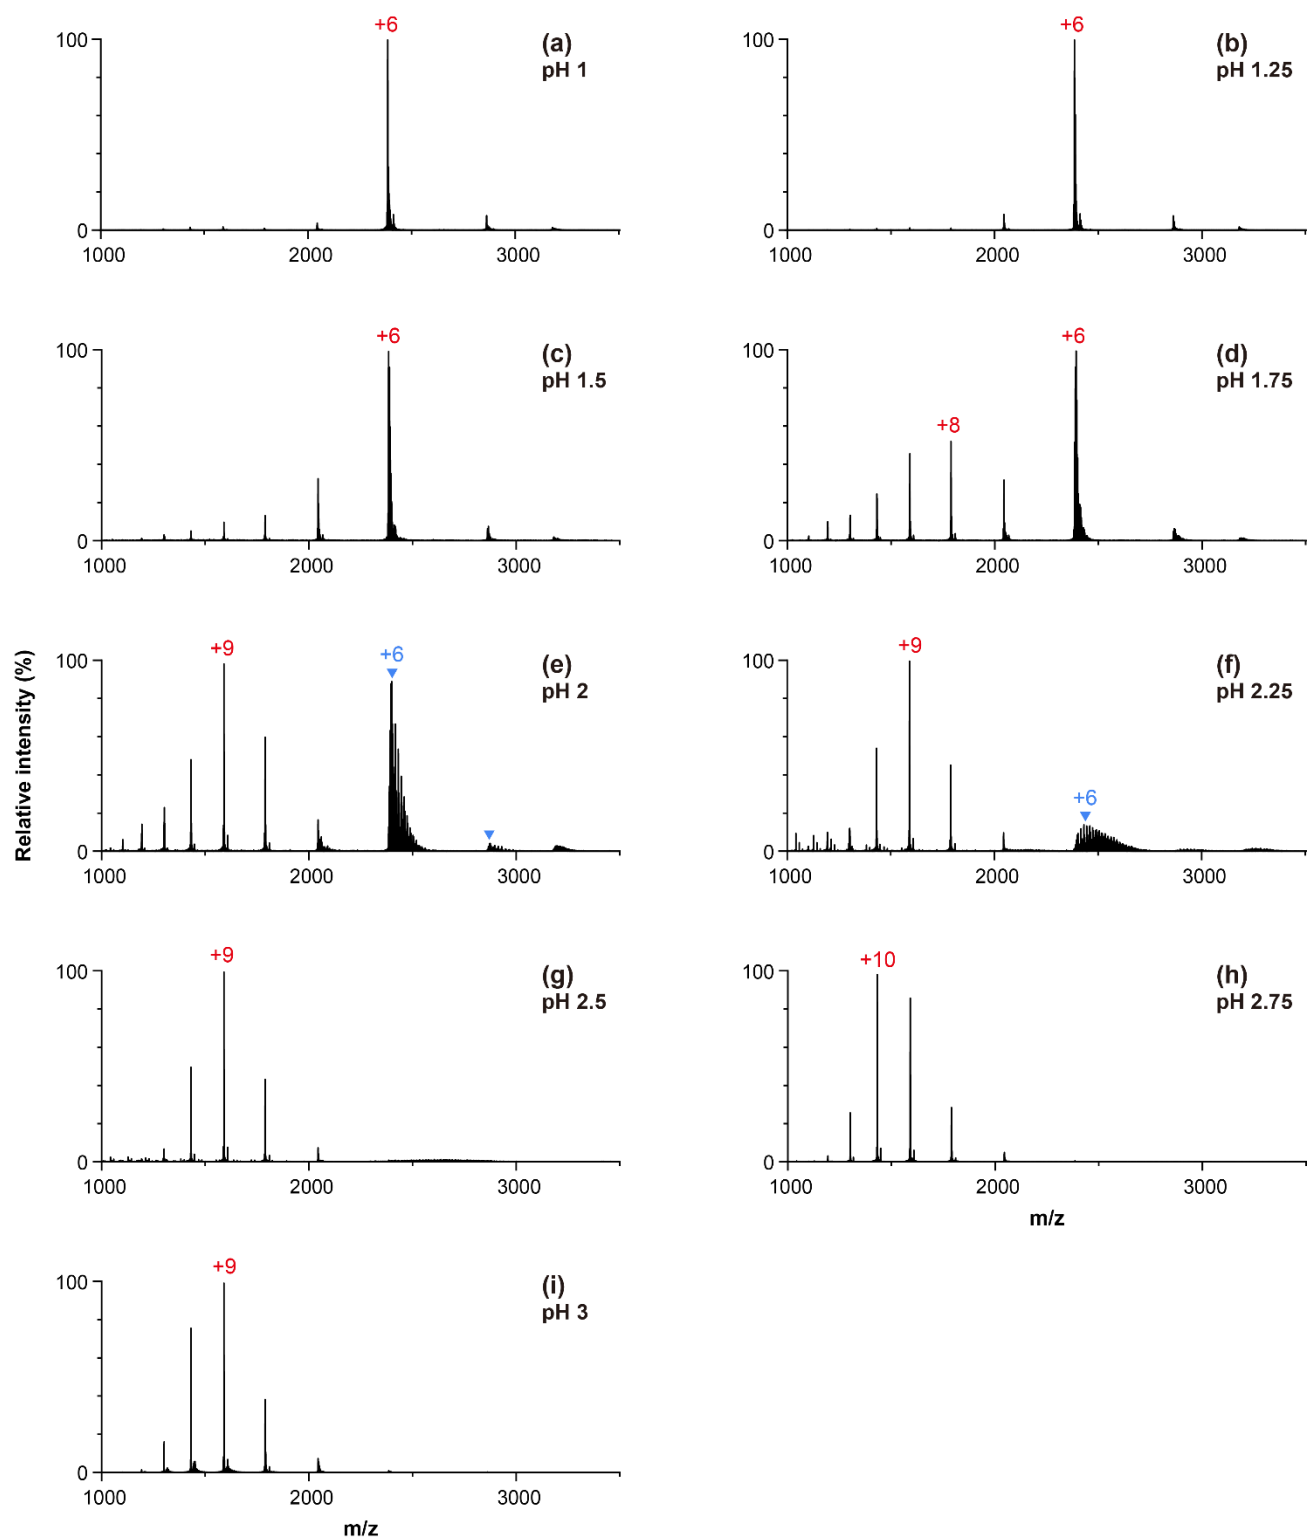

**Figure S12.** High-pressure ESI mass spectra of 10  $\mu\text{M}$  lysozyme in HNO<sub>3</sub> aqueous solution with different pH values. The blue ▼ denotes peaks with adducts from acid, sodium, and sodium salt.

Figure S13: MS of lysozyme in TCA with incremental pH (pH 1-3)

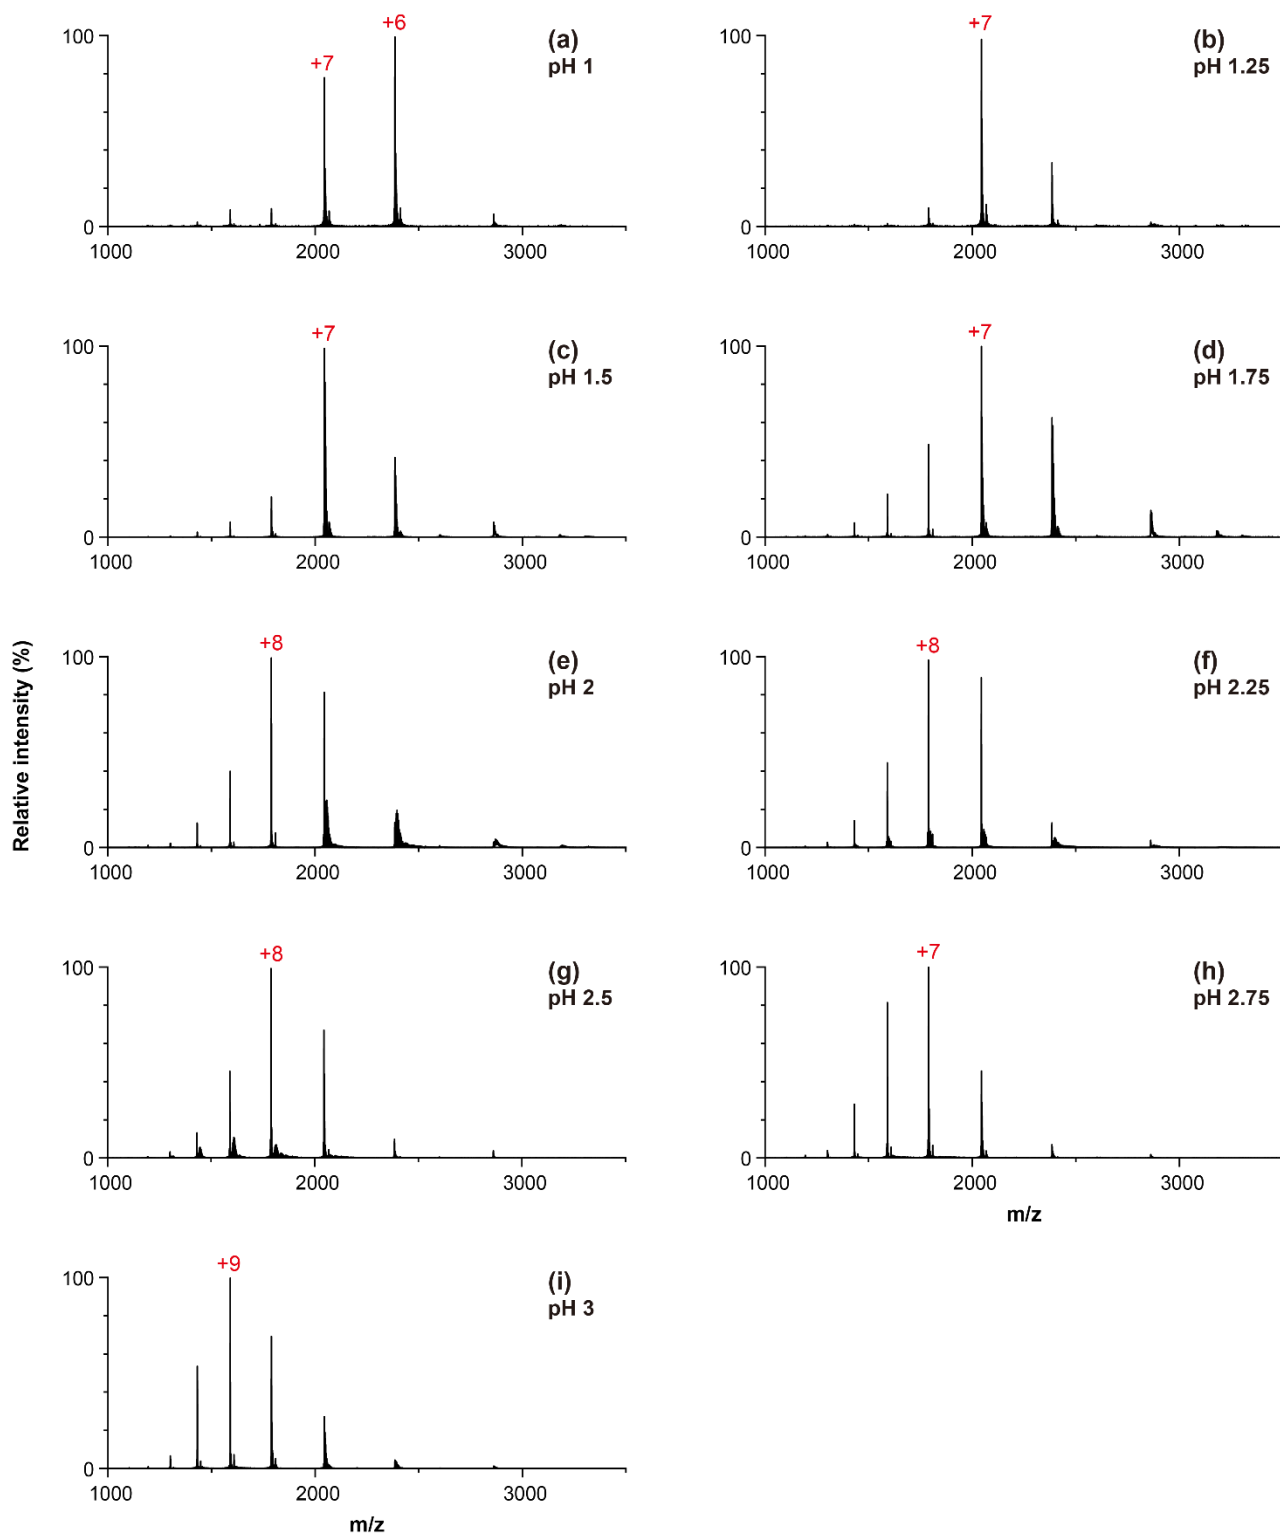

**Figure S13.** High-pressure ESI mass spectra of 10  $\mu\text{M}$  lysozyme in TCA aqueous solution with different pH values.

Figure S14: MS of lysozyme in HClO<sub>4</sub> with incremental pH (pH 1-3)

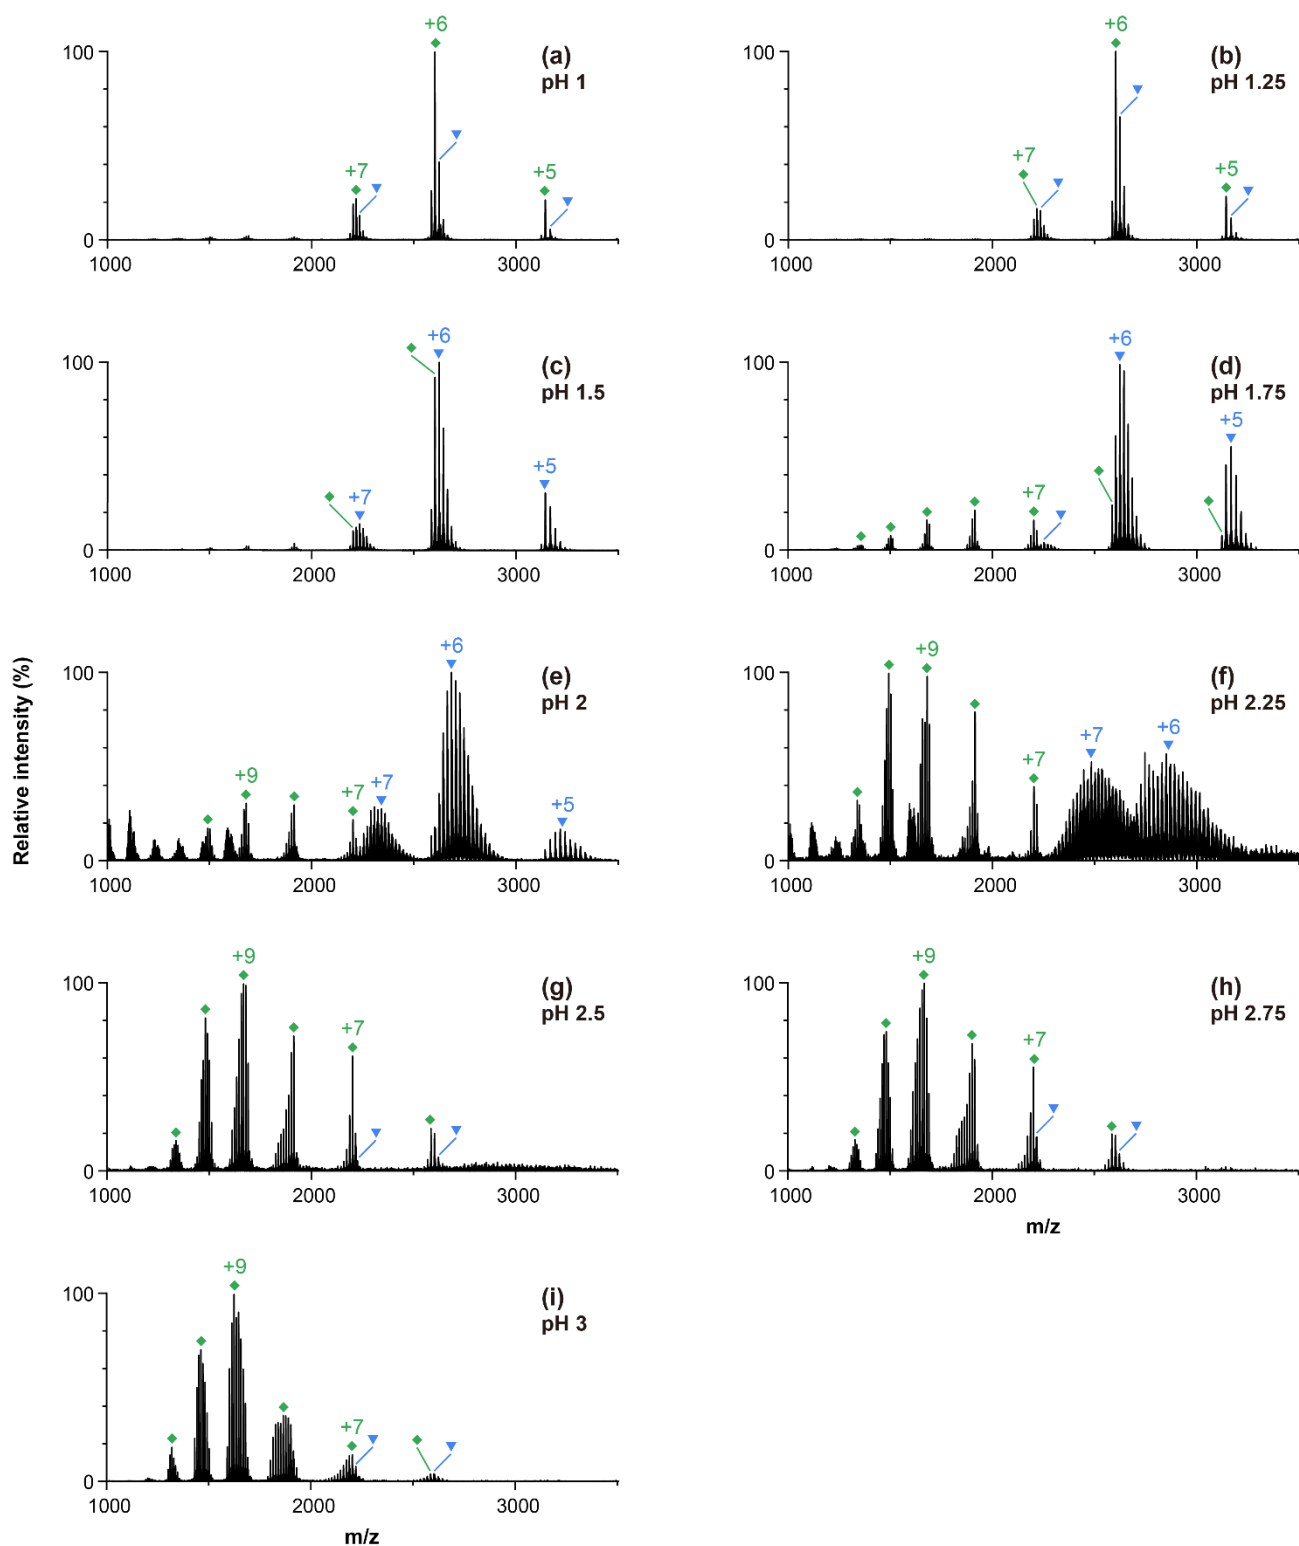

**Figure S14.** High-pressure ESI mass spectra of 10  $\mu\text{M}$  lysozyme in HClO<sub>4</sub> aqueous solution with different pH values. The green  $\blacklozenge$  denotes protonated peaks with acid adducts, and the blue  $\blacktriangledown$  denotes peaks with adducts from acid, sodium, and sodium salt.



Figure S15: Magnified MS for lysozyme in HClO<sub>4</sub>

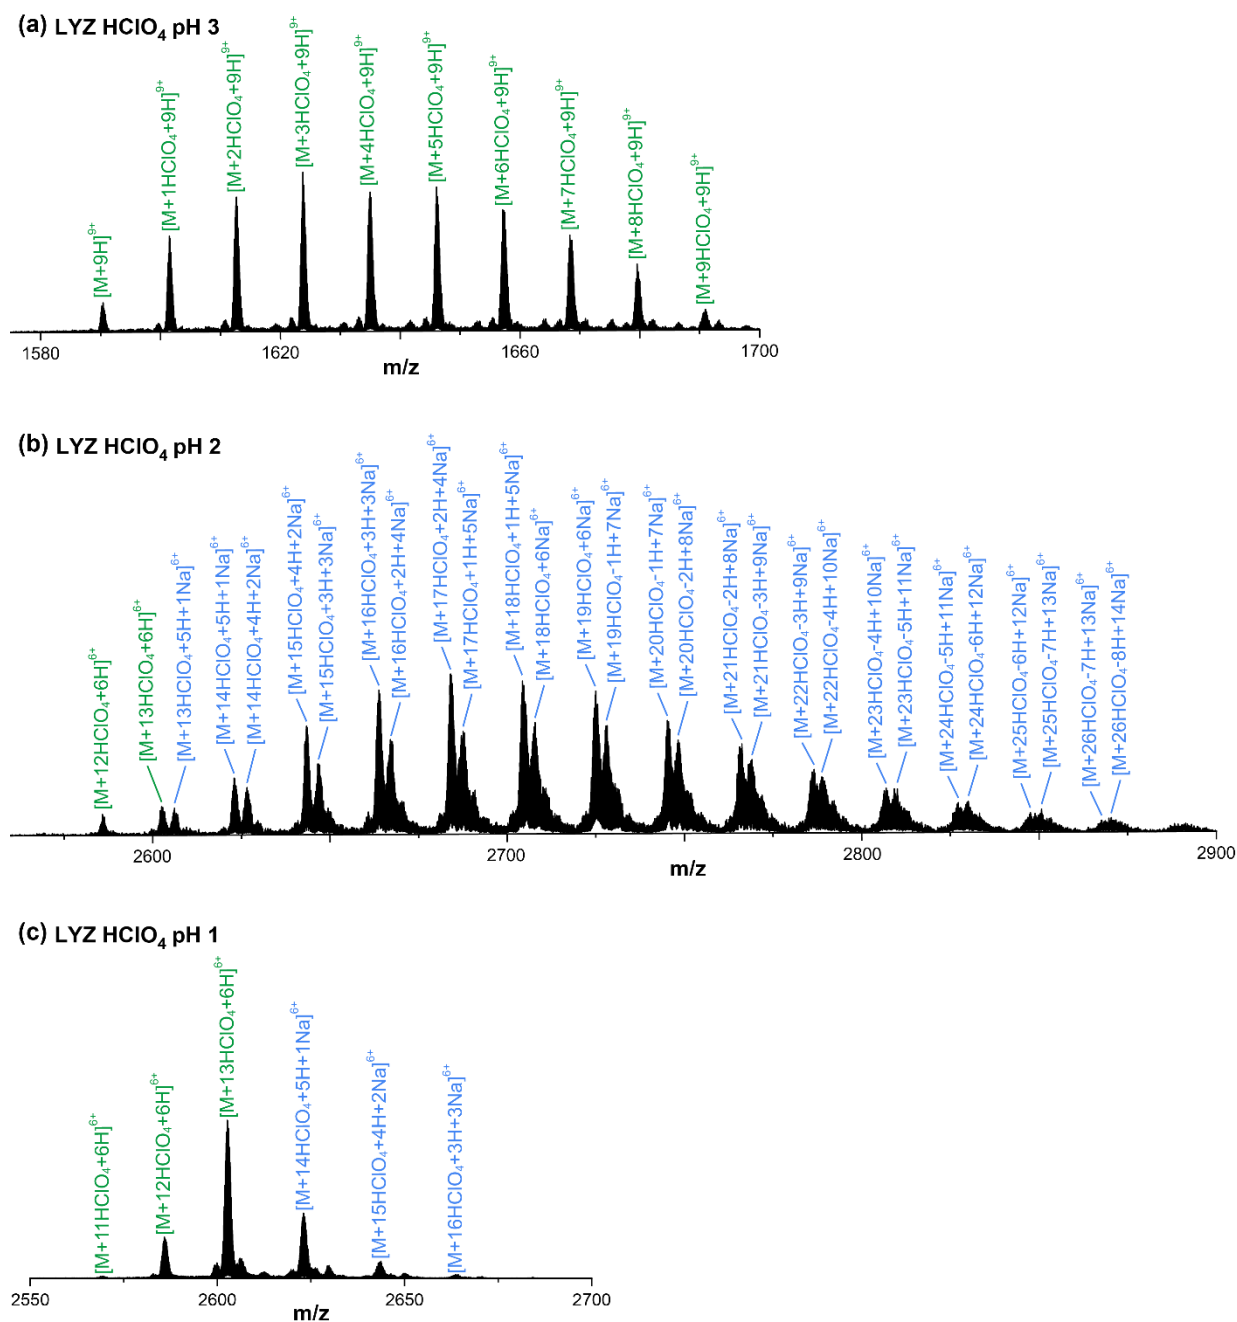

Figure S15. Magnified mass spectra for lysozyme in perchloric acid (HClO<sub>4</sub>) with a) pH 3, b) pH 2, and c) pH 1.

Figure S16: MS of myoglobin in different acids with pH 2

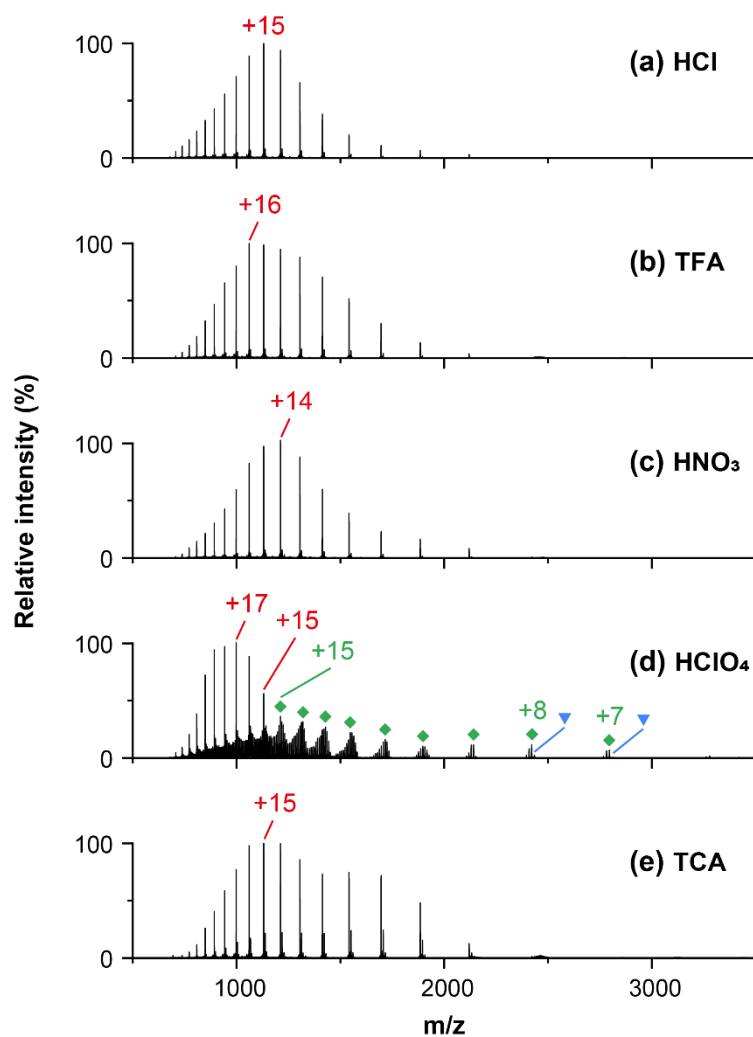

**Figure S16.** High-pressure ESI mass spectra of 10  $\mu$ M myoglobin in different acidic solutions with pH 2. The green  $\blacklozenge$  denotes protonated peaks with acid adducts, and the blue  $\blacktriangledown$  denotes peaks with adducts from acid, sodium, and sodium salt.

Figure S17: MS of Ubiquitin in different acids with pH 2

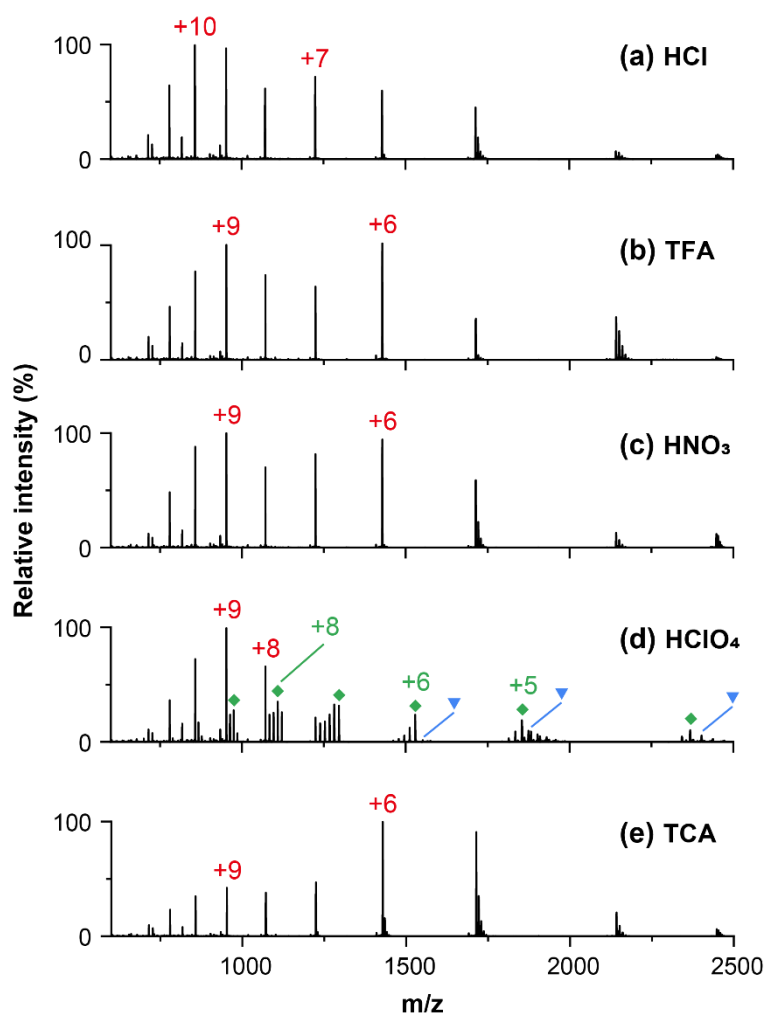

**Figure S17.** High-pressure ESI mass spectra of 10  $\mu$ M ubiquitin in different acidic solutions with pH 2. The green  $\blacklozenge$  denotes protonated peaks with acid adducts, and the blue  $\blacktriangledown$  denotes peaks with adducts from acid, sodium, and sodium salt.

Figure S18: Magnified MS for equine & bovine cytochrome c, lysozyme, myoglobin, ubiquitin

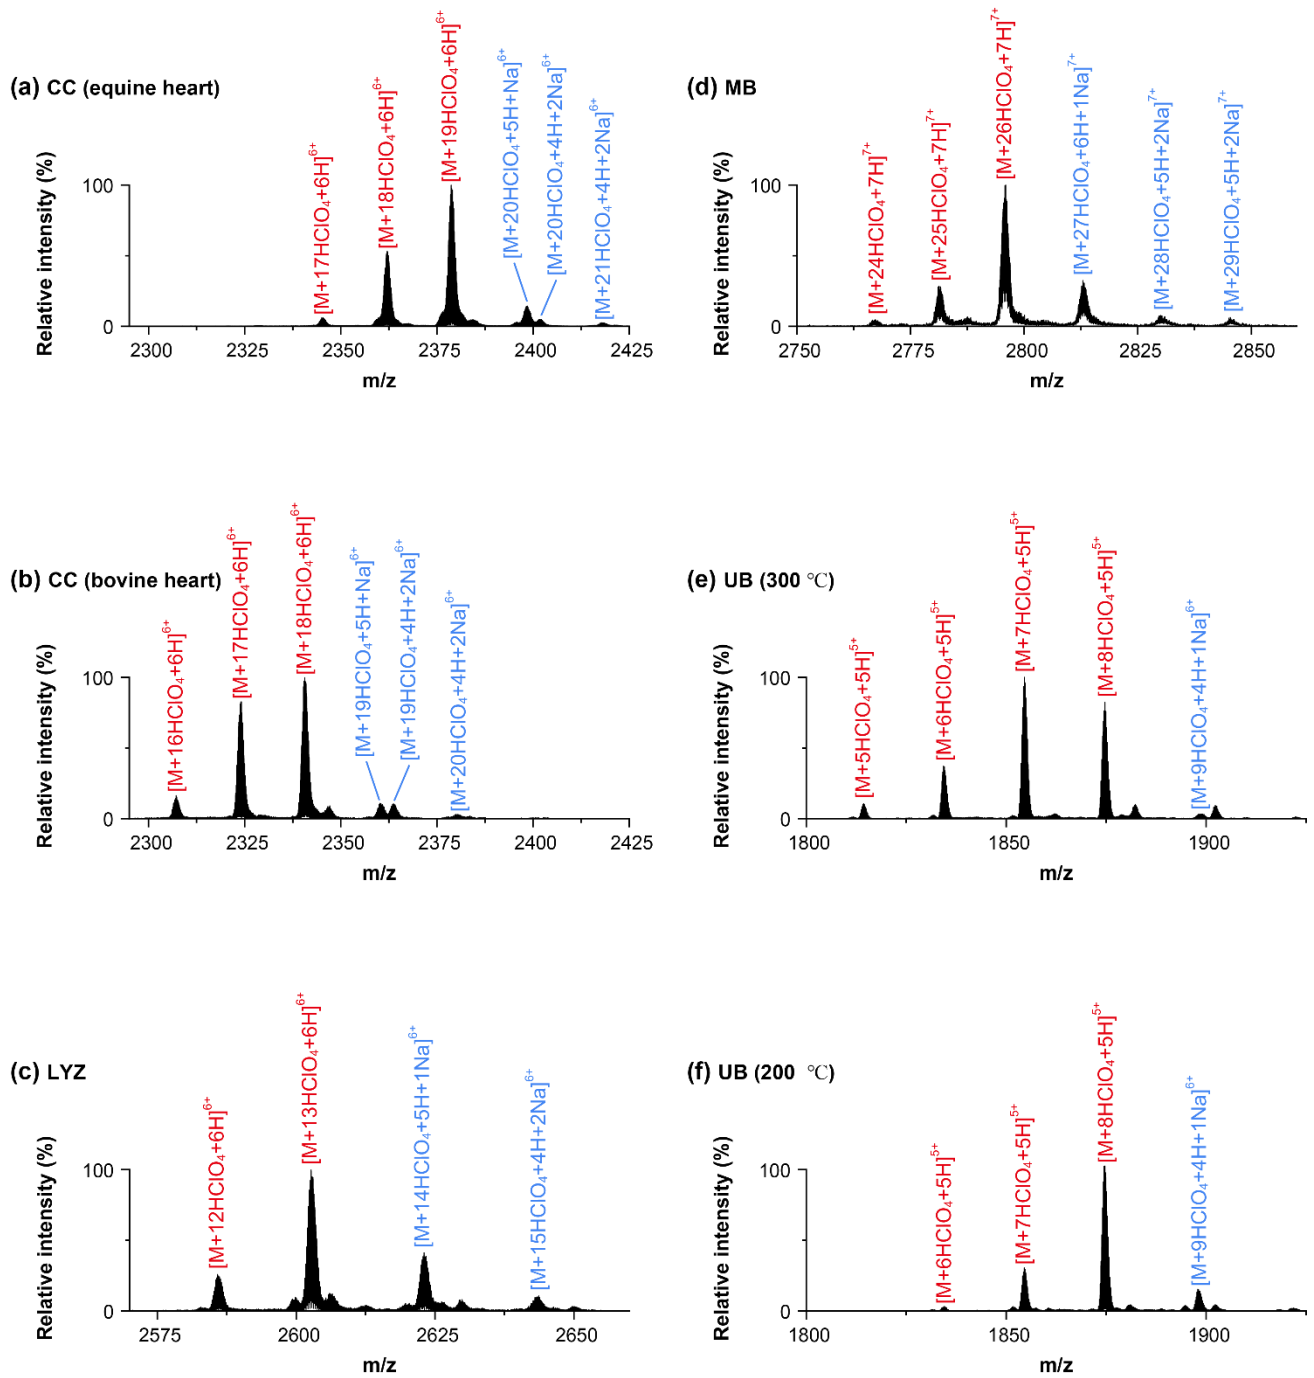

Figure S18. Magnified mass spectra for a) equine cytochrome c, b) bovine cytochrome c, c) lysozyme, d) myoglobin, and e) ubiquitin in perchloric acid (HClO<sub>4</sub>) with pH 1.

Figure S19: CD spectra for cytochrome *c* & myoglobin

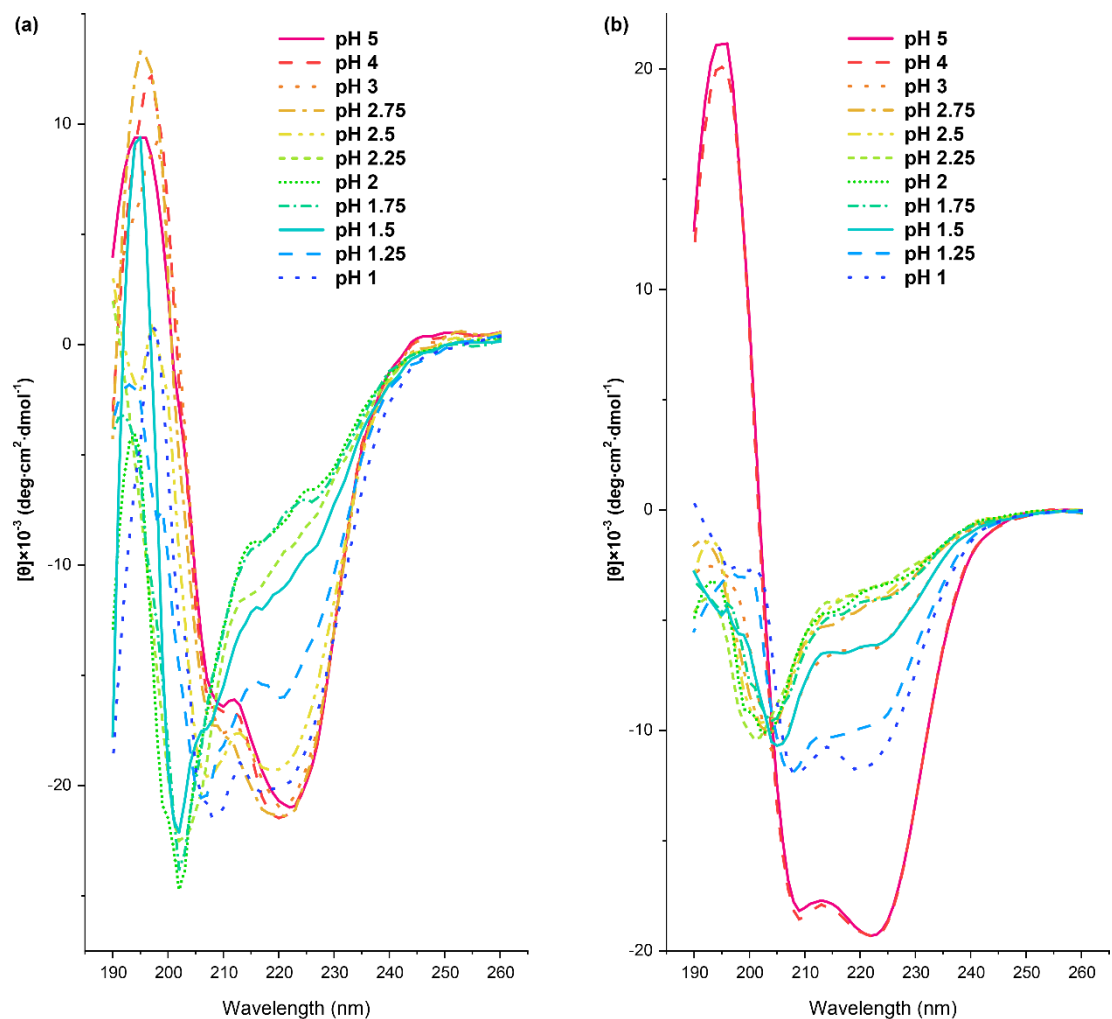

**Figure S19.** CD spectrum of cytochrome *c* (a) and myoglobin (b) in trifluoroacetic acid solution with different pHs. The vertical axis is the mean residue ellipticity.

Figure S20: Average charge states

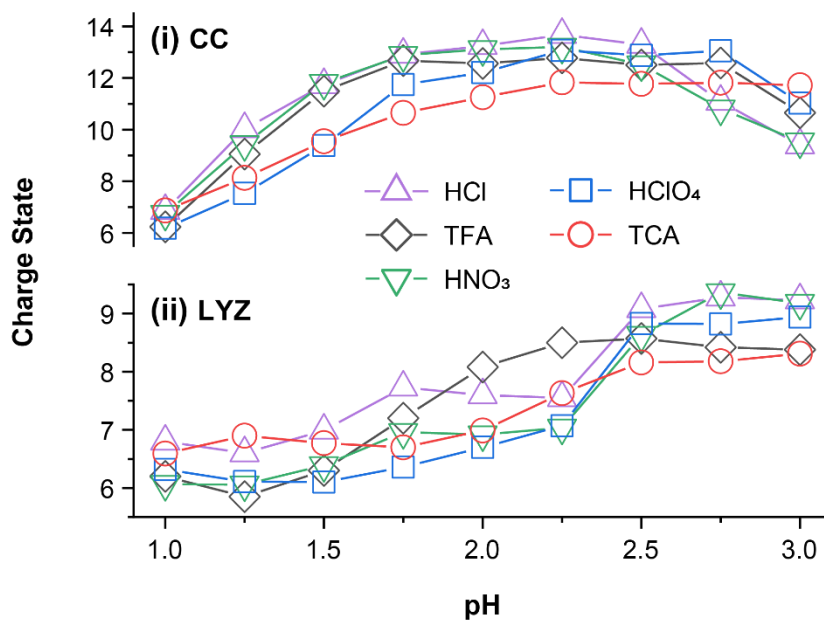

**Figure S20.** a) Average charge state of cytochrome *c* (i) and lysozyme (ii) versus pH for different acids (HCl: purple  $\Delta$ , TFA: gray  $\diamond$ , HNO<sub>3</sub>: green  $\nabla$ , HClO<sub>4</sub>: blue  $\square$ , TCA: red  $\circ$ ).

Figure S21: Average charge for HCSD & LCSD at different pHs

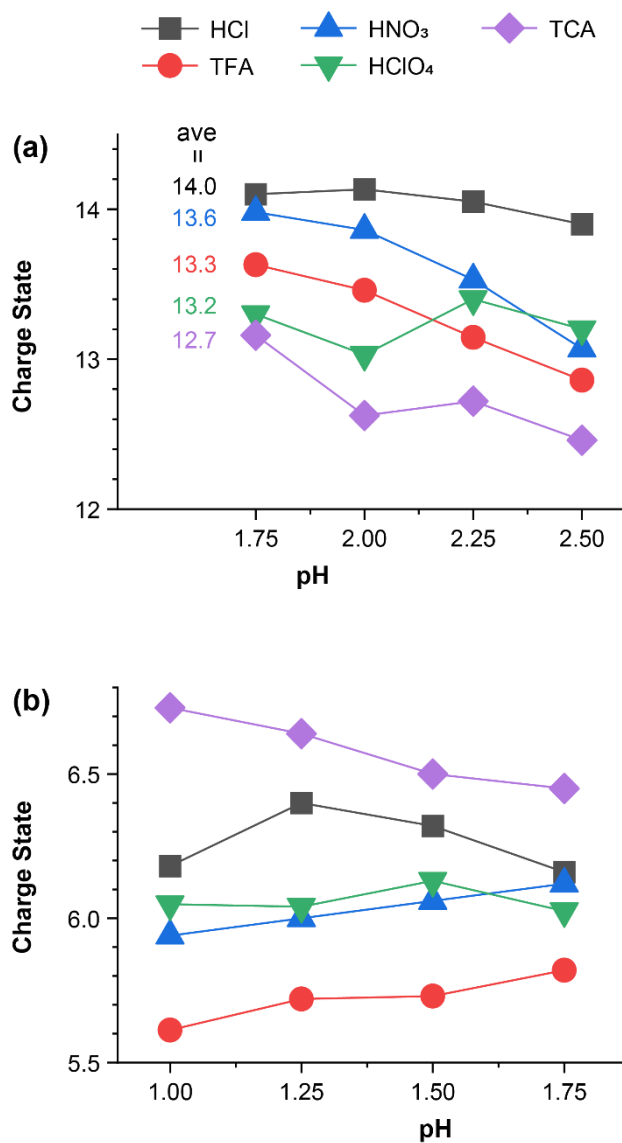

**Figure S21.** a) Average charge state for the high-charge-state distribution (HCSD) of equine cytochrome *c* for pH from 1.75 to 2.5. b) Average charge state for the low-charge-state distribution (LCSD) for pH from 1 to 1.75.

Figure S22: Addition of  $\text{NH}_4\text{OH}$  (cytochrome *c*)

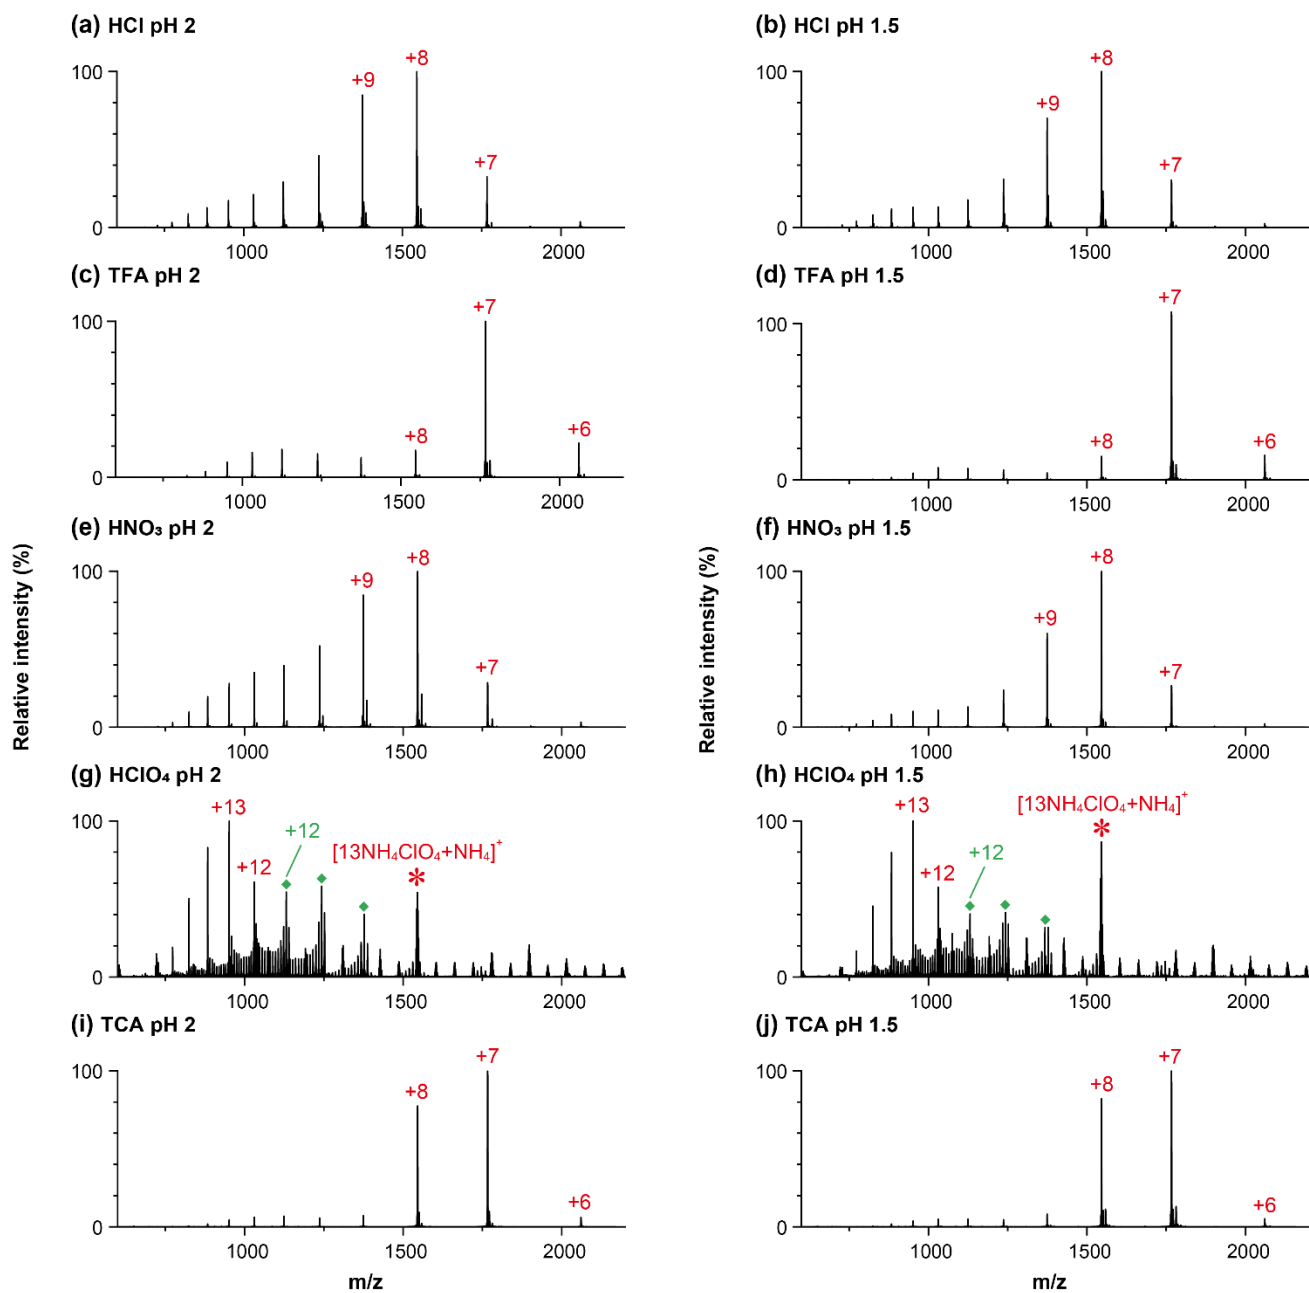

**Figure S22.** Mass spectra of equine cytochrome *c* prepared by titrating the pH 1 acid solutions with  $\text{NH}_4\text{OH}$  to pH 2 (left) and pH 1.5 (right).





Figure S24: Addition of  $\text{NH}_4\text{OH}$  (ubiquitin)

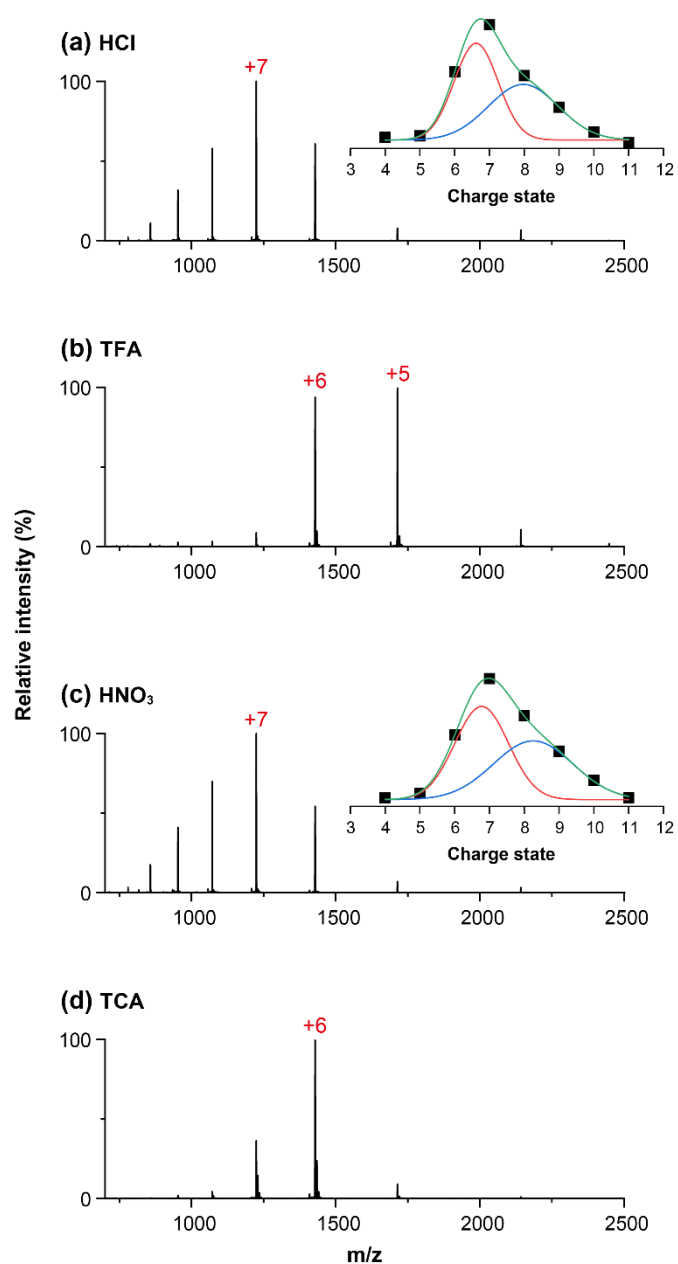

**Figure S24.** Mass spectra of ubiquitin in HCl, TFA,  $\text{HNO}_3$ , and TCA with the presence of ammonium salt. pH = 1.5. The solution is prepared by titrating the pH 1 acid solution to 1.5 using  $\text{NH}_4\text{OH}$ . For (a) HCl and (c)  $\text{HNO}_3$ , the fitting method is used to estimate the average value for high charge and low charge state distribution (insets). Assume Gaussian distribution.

Figure S25: Addition of  $\text{NH}_4\text{OH}$  (lysozyme)

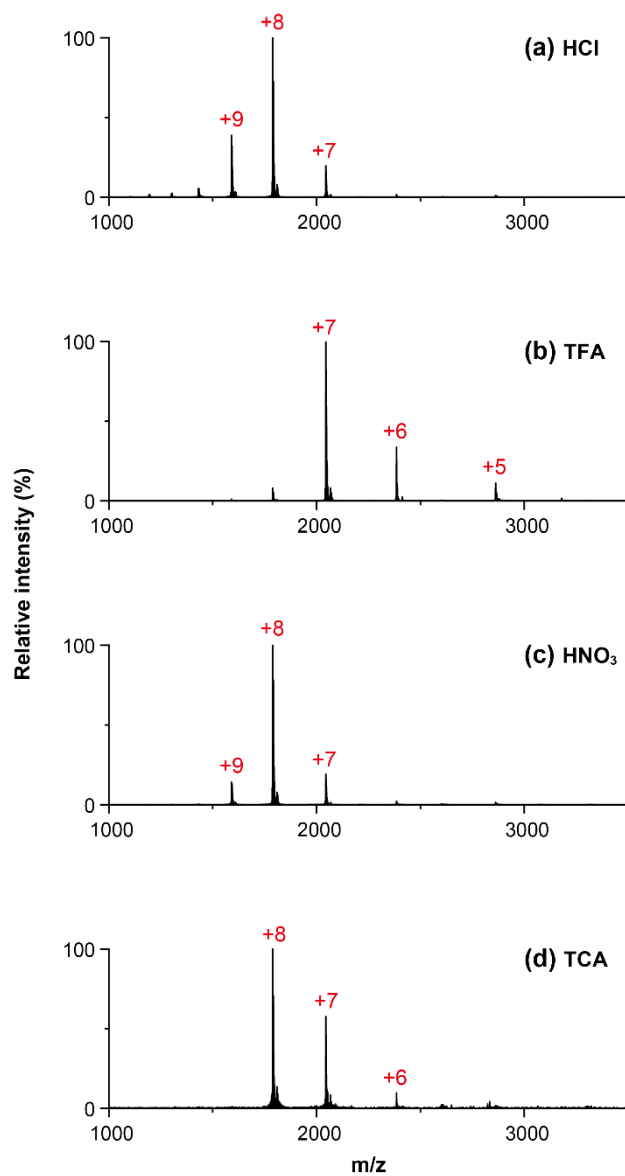

**Figure S25.** Mass spectra of lysozyme in HCl, TFA,  $\text{HNO}_3$ , and TCA with the presence of ammonium salt. pH = 1.5. The solution is prepared by titrating the pH 1 acid solution to 1.5 using  $\text{NH}_4\text{OH}$ .
